# Supplementary material for: Retrograde ERK activation waves drive base-to-apex multicellular flow in murine cochlear duct morphogenesis
Source: eLife. 2021 Mar 5;10:e61092. doi: 10.7554/eLife.61092 (PMC7935486; doi:10.7554/eLife.61092)
Supplement: Figure 1—source data 1. [file elife-61092-fig1-data1.xlsx]

## Sheet: E12.5
Curvature in LEL				Thickness in LEL
distance from the tip	sample1	sample2	sample3	distance from the tip	sample1	sample2	sample3
-7.52499	-0.00908046	-0.00749487	-0.0136624	0	31.7542	28.0318	29.215
7.52499	-0.00721181	-0.0138875	-0.0111859	15.05	31.8128	28.7167	27.7157
22.575	-0.00649062	-0.00992912	-0.0141566	30.1	29.8839	29.8342	26.3572
37.6249	-0.00826677	-0.0140457	-0.0141954	45.1499	28.896	30.476	25.0441
52.6749	-0.0138306	-0.0146815	-0.0131111	60.1999	28.4072	30.7961	23.6598
67.7249	-0.0112227	-0.00995006	-0.0142433	75.2499	26.8634	30.5945	22.8209
82.7749	-0.00187776	-0.0131327	-0.0140697	90.2999	26.2222	30.5342	22.453
97.8249	-0.00751206	-0.0189339	-0.0117104	105.35	26.0779	29.8952	22.2203
112.875	-0.0226255	-0.012279	-0.00665433	120.4	26.0049	29.5381	22.1999
127.925	-0.0151448	-0.0210123	-0.00454507	135.45	25.2369	28.4992	22.5324
142.975	-0.00293062	-0.00650504	-0.0133008	150.5	25.1047	27.4635	22.9216
158.025	-0.00652978	0.00714113	-0.0129227	165.55	25.5864	26.1917	22.8392
173.075	-0.014369	-0.0114072	-0.00286388	180.6	25.413	25.7749	23.0675
188.125	-0.0152308	-0.0151253	-0.00975714	195.65	24.9293	24.4963	23.3904
203.175	-0.00994053	-0.00960126	-0.0142792	210.7	24.9936	23.6776	23.4594
218.225	-0.00246809	-0.000896026	-0.00289286	225.75	25.5689	23.9174	23.3636
233.275	-0.00098385	-0.00143755	0.00131048	240.8	25.4312	23.6146	23.7179
248.325	-0.00697324	-0.00571995	-0.00389919	255.85	25.6399	22.8108	23.5217
263.375	-0.00155792	-0.00536217	-0.00786711	270.9	25.7247	22.7322	23.0056
278.425	-0.00887587	-0.0069023	-0.0101173	285.95	25.7135	22.893	22.7219
293.475	-0.00992345	-0.00729097	-0.00999406	301	25.9435	22.3109	23.0883
308.525	-0.00278001	-0.00364321	-0.00264023	316.05	26.2241	21.9857	22.7143
323.575	-0.00757736	-0.00158434	-0.00337101	331.1	26.5335	21.6173	22.1329
338.624	-0.00535931	-0.00485144	-0.00812851	346.149	27.1337	21.0711	22.3133
353.674	-0.00599456	-0.00557105	-0.0128986	361.199	27.1107	20.8335	22.1688
368.724	-0.00721122	-0.00164207	-0.00697485	376.249	26.8972	20.5534	21.4664
383.774	-0.00137523	-0.00163085	0.00489758	391.299	26.4699	19.6978	21.1788
398.824	0.00203563	-0.0085683	0.000597078	406.349	26.1104	19.3088	21.4196
413.874	-0.0117173	-0.00873876	-0.00492627	421.399	25.2681	19.2513	21.1272
428.924	-0.0095543	0.00207814	-0.00642124	436.449	24.7532	19.1546	21.0482
443.974	0.00299044	0.00288332	-0.0076608	451.499	23.7156	19.0966	21.3611
459.024	0.00136993	-0.00531669	-0.0020356	466.549	22.7199	19.7805	21.472
474.074	-0.00551713	-0.00430224	-0.00368217	481.599	22.1229	20.7115	21.5977
489.124	-0.00579966	-0.00232758	-0.00517641	496.649	22.0894	21.1547	21.8815
504.174	-0.000272558	-0.00442554	-0.00339647	511.699	22.0752	21.3571	21.9292
519.224	-0.002045	-0.00240431	-0.00294124	526.749	22.5144	21.7064	21.5909
534.274	-0.0053858	-0.00473808	-0.00501401	541.799	22.6733	21.8641	21.532
549.324	-0.00479464	-0.012073	-0.00469871	556.849	22.5093	21.4539	21.5911
564.374	-0.00523065	-0.00326548	-0.0016546	571.899	22.0678	21.2485	21.5767
579.424	-0.00638078	0.0030589	-0.00387274	586.949	21.529	21.0928	21.4815
594.474	-0.00352947	-0.00478685	-0.00587991	601.999	20.883	20.7126	21.4819
609.524	-0.00448629	-0.00927366	-0.00434245	617.049	20.6204	21.0532	21.255
624.574	-0.00419007	-0.00724383	-0.00603929	632.099	20.7041	21.5158	21.0486
639.624	0.000981054	-0.00609786	-0.00402792	647.149	20.9104	22.0926	20.8926
654.674	-0.00623197	-0.00817303	-0.00461492	662.199	21.4041	22.739	21.2203
669.724	-0.0120459	-0.00647037	-0.00352586	677.249	22.2398	23.0379	21.6438
684.774	-0.00603124	-0.00466138	0.00126641	692.299	23.1417	22.7898	22.2631
699.824	-0.00411995	-0.000587373	-0.00466243	707.349	23.9373	22.7115	22.6409
714.874	-0.00542313	0.000687413	-0.00679053	722.399	24.745	23.0317	22.9566
729.924	-0.00327159	-0.000855773	-0.0027731	737.449	25.3073	23.5998	23.2054
744.974	-0.00336725	-0.00299513	-0.0030622	752.499	25.7619	25.0042	23.6728
760.024	-0.00356678	-0.000849212	-0.00557596	767.549	26.3037	26.4008	24.0922
775.074	-0.00295623	-0.0101263	-0.0052879

## Sheet: E13.5
Curvature in LEL				Thickness in LEL
distance from the tip	sample1	sample2	sample3	distance from the tip	sample1	sample2	sample3
-7.52499	-0.00992815	-0.013988	-0.0126351	0	23.3056	27.967	23.4161
7.52499	-0.0200716	-0.0196367	-0.0136678	15.05	22.4502	27.6118	22.4198
22.575	-0.014413	-0.0116045	-0.0201791	30.1	21.4268	26.3344	22.4366
37.6249	-0.0132395	-0.0119259	-0.0133561	45.1499	20.5122	25.0587	21.9747
52.6749	-0.0151008	-0.0176792	-0.00670288	60.1999	19.7921	23.9008	21.7367
67.7249	-0.014059	-0.014723	-0.00889193	75.2499	19.3392	22.8516	21.2326
82.7749	-0.0133753	-0.00815986	-0.0133018	90.2999	19.2758	22.3208	20.7613
97.8249	-0.0127512	-0.0102806	-0.0119969	105.35	20.1435	21.7624	20.4386
112.875	-0.0111426	-0.014452	-0.00949688	120.4	21.1407	21.9842	20.227
127.925	-0.011028	-0.0151133	-0.00827824	135.45	22.0543	22.325	19.8959
142.975	-0.00711692	-0.0123102	-0.00892024	150.5	22.8553	22.777	19.8898
158.025	-0.00450831	-0.00894359	-0.00651052	165.55	23.1182	22.7017	19.7311
173.075	-0.00456254	-0.00727305	-0.00488776	180.6	23.2077	22.9228	19.8347
188.125	-0.00562392	-0.00684297	-0.00755352	195.65	23.5245	23.0953	20.0095
203.175	-0.00864525	-0.00713096	-0.00961534	210.7	23.7112	23.1899	20.6556
218.225	-0.00468038	-0.00467907	-0.00837185	225.75	23.8065	22.8485	21.2163
233.275	-0.00345134	-0.000685532	-0.00280993	240.8	23.8979	22.4834	21.8406
248.325	-0.00619168	-0.00238018	-0.0020592	255.85	23.2887	22.2866	22.0209
263.375	-0.00541268	-0.00857745	-0.00458855	270.9	22.2439	22.0101	21.8171
278.425	-0.00202465	-0.00837392	-0.00760723	285.95	21.4331	21.6216	21.3899
293.475	-0.00365656	-0.00197068	-0.00885064	301	20.8826	21.3471	21.1194
308.525	-0.00842439	0.000726341	-0.00716456	316.05	20.3807	21.5004	20.8152
323.575	-0.00547746	-0.00346257	-0.00370676	331.1	19.9899	21.7194	20.7448
338.624	-0.00533425	-0.00651463	-0.0023154	346.149	19.4957	21.9036	20.8645
353.674	-0.00781123	-0.00605659	-0.00585384	361.199	19.3019	22.2751	21.0316
368.724	-0.00939306	-0.0079458	-0.00964162	376.249	18.9311	22.5682	20.8472
383.774	-0.0103129	-0.00949068	-0.0104724	391.299	18.6129	22.8236	20.3694
398.824	-0.0089571	-0.00914842	-0.00821171	406.349	18.5581	22.6187	20.0365
413.874	-0.00685566	-0.00652446	-0.00831003	421.399	18.7281	22.0883	19.9034
428.924	-0.0058951	-0.00632915	-0.00601288	436.449	18.6276	21.5887	19.6641
443.974	-0.00487772	-0.00690892	-0.0039046	451.499	18.5485	21.8039	19.4499
459.024	-0.00299028	-0.00728063	-0.00541467	466.549	18.7223	22.2309	19.3783
474.074	-0.00230128	-0.00700403	-0.00479516	481.599	18.8531	22.8798	19.1881
489.124	-0.00233112	-0.00457141	-0.00163326	496.649	19.065	23.5024	19.0864
504.174	-0.00395475	-0.00392173	-0.000692852	511.699	19.4	23.6526	19.0213
519.224	-0.00600181	-0.00533632	-0.00387988	526.749	19.7192	23.2115	19.1162
534.274	-0.00746924	-0.00470749	-0.00363922	541.799	20.114	22.4088	19.0628
549.324	-0.00531993	-0.00503524	-0.00407673	556.849	20.7919	21.5737	19.1798
564.374	-0.0063313	-0.00546294	-0.00275843	571.899	21.4616	20.957	19.7239
579.424	-0.00489687	-0.00325553	-0.00344899	586.949	22.1378	20.7918	20.6441
594.474	-0.0034263	-0.00325234	-0.00764206	601.999	22.4169	20.7854	21.6244
609.524	-0.010211	-0.00427306	-0.00885647	617.049	22.4457	20.7728	22.5926
624.574	-0.00710983	-0.00432489	-0.00707226	632.099	22.3438	20.9844	23.1002
639.624	-0.000984312	-0.00363054	-0.00256341	647.149	22.2237	21.0767	23.0602
654.674	-0.00439292	-0.00311688	-0.00233936	662.199	22.0525	20.6984	23.0517
669.724	-0.00638333	-0.00590956	-0.00515383	677.249	22.1002	20.2831	22.4851
684.774	-0.00398834	-0.00698533	-0.00450128	692.299	22.0703	19.9859	22.0031
699.824	-0.00420915	-0.00358017	-0.0059935	707.349	21.6437	19.6272	21.9291
714.874	-0.00781859	-0.00527309	-0.00745178	722.399	21.1073	19.3401	22.155
729.924	-0.00749701	-0.00662122	-0.00323279	737.449	20.3723	19.4059	22.0921
744.974	-0.00374413	-0.00349196	-0.00470509	752.499	19.6686	19.6054	22.196
760.024	-0.00520394	-0.00190414	-0.00604054	767.549	19.1518	19.8875	22.3861
775.074	-0.00461282	-0.00352359	-0.00427067

## Sheet: E14.5
Curvature in LEL					Thickness in LEL
distance from the tip	sample1	sample2	sample3	sample4	distance from the tip	sample1	sample2	sample3	sample4
-7.61287	-0.00489119	-0.0168428	-0.00718755	-0.0127164	0	31.1416	24.341	29.0144	30.0166
7.61287	-0.00815554	-0.015406	-0.00278511	-0.00690089	15.2257	28.7829	22.8984	25.8862	26.8205
22.8386	-0.0121255	-0.0230348	-0.0114424	-0.0104687	30.4515	26.6504	21.5593	23.6508	24.1148
38.0643	-0.0138254	-0.0165173	-0.0119365	-0.0197467	45.6772	25.1975	20.1436	21.7688	22.0922
53.2901	-0.011216	-0.00457054	-0.0110552	-0.0142834	60.903	23.8091	18.8636	20.7605	20.4877
68.5158	-0.0134582	-0.00167068	-0.0116153	-0.00615521	76.1287	22.9618	18.1001	20.2219	20.1309
83.7416	-0.0152121	-0.00595521	-0.0110594	-0.0133949	91.3544	22.5215	18.0519	20.1964	20.4172
98.9673	-0.0132	-0.0123521	-0.00977877	-0.0131421	106.58	22.3699	17.7426	20.4025	21.0792
114.193	-0.0109737	-0.00905026	-0.00509125	-0.0065796	121.806	22.0901	17.5601	20.7204	22.0683
129.419	-0.00364554	-2.61658e-18	-0.000834752	-0.00839947	137.032	21.763	17.9715	20.6844	22.9679
144.645	0.00190575	-0.00707731	-0.00464202	-0.00418719	152.257	21.1151	18.241	20.9682	23.3325
159.87	-0.00484195	-0.00884435	-0.00695451	-0.000998353	167.483	20.5928	18.1992	21.0128	23.5513
175.096	-0.00821547	-0.00323689	-0.00329543	-0.00656317	182.709	20.05	18.2372	21.2746	23.366
190.322	-0.00435683	-0.00656317	-0.00553842	-0.00544366	197.935	19.3456	18.5809	21.2994	22.8033
205.547	-0.00633814	-0.0082892	-0.00439457	-0.00118919	213.16	19.1429	18.2598	21.293	22.4242
220.773	-0.00502051	-0.00793782	-0.000388209	-0.00353492	228.386	19.8029	17.8645	21.2459	22.6886
235.999	-0.00160602	-0.0052523	-0.00509156	-0.011216	243.612	20.6517	17.3904	21.2754	23.0796
251.225	-0.000408294	-0.0066156	-0.00838139	-0.00869717	258.838	21.2936	17.3428	21.3224	23.9615
266.45	-0.00373843	-0.00547999	-0.00886962	-0.00323086	274.063	22.1268	17.3428	21.9414	24.5172
281.676	-0.00490165	-0.00347053	-0.00515489	-0.00194353	289.289	22.4695	17.617	22.1391	24.6778
296.902	-0.00302522	-0.00381755	-1.43957e-18	-0.00355307	304.515	22.7344	17.9842	21.8564	24.4134
312.128	-0.00449718	-0.00459989	-0.00335887	-0.00620284	319.741	23.0945	18.4536	21.9063	24.1006
327.353	-0.00720969	-0.00935452	-0.00650121	-0.0034563	334.966	23.3281	18.4272	22.0521	23.4039
342.579	-0.0064213	-0.00621739	-0.00608786	-0.00148009	350.192	23.6663	18.5816	21.9432	23.0827
357.805	-0.00438058	-0.00493368	-0.0030268	-0.00145768	365.418	24.4894	19.1938	22.2741	22.9512
373.031	-0.00525786	-0.00693854	-6.71163e-05	-0.00303557	380.643	25.0479	19.8	22.6039	22.7524
388.256	-0.0041662	-0.00587681	-0.00163618	-0.00480397	395.869	25.3735	20.3187	22.514	22.2293
403.482	-0.00469178	-0.00530525	-0.0065516	-0.00460683	411.095	25.3753	21.012	22.2013	21.7422
418.708	-0.00245934	0.00161731	-0.00863959	-0.00519337	426.321	25.2682	21.2858	22.2252	21.2559
433.934	-0.00220462	-1.30198e-18	-0.00746605	-0.003979	441.546	25.1725	20.776	22.6252	21.0461
449.159	-0.00822784	-0.00797445	-0.00672495	-0.00541803	456.772	25.006	20.4951	23.4714	21.3009
464.385	-0.00654896	-0.00214586	-0.00152358	-0.00530525	471.998	24.7018	20.4184	24.5973	21.7188
479.611	-0.00154129	0.00351519	0.00139225	-0.00511894	487.224	24.8919	20.2258	25.837	21.8826
494.836	-0.00361572	-0.00471623	-0.000823677	-0.00827982	502.449	24.6607	20.3978	26.4436	21.9412
510.062	-0.00213594	-0.00789989	-9.82247e-19	-0.00576911	517.675	24.3339	20.3423	26.6979	21.6539
525.288	-0.00161287	-0.0054232	-0.00274323	-0.00315643	532.901	24.0835	19.902	26.8139	20.7672
540.514	-0.00657187	-0.00529729	-0.00716503	-0.00522331	548.127	23.7706	19.2801	26.7972	20.0298
555.739	-0.00653291	-0.00365722	-0.00469178	-0.0108572	563.352	23.2054	18.6965	26.4714	19.3908
570.965	-0.00459882	-0.00481435	-0.00220887	-0.00735436	578.578	23.2451	18.2739	26.2376	18.7418
586.191	-0.00304214	-0.00460636	-0.00315643	-0.00160154	593.804	22.8691	18.3591	26.2144	18.308
601.417	-0.00311421	-0.00290344	-0.00522331	-0.00429265	609.03	22.4626	18.7842	26.0831	18.3222
616.642	-0.0033645	0	-0.00337131	-0.0054438	624.255	22.1412	19.1312	25.7114	18.3864
631.868	-0.00557497	-2.61658e-18	-0.00338022	-0.0015086	639.481	22.0825	19.64	24.9703	18.3504
647.094	-0.00479674	-0.00369738	-0.00358717	-0.000322749	654.707	22.0372	19.9594	24.0779	18.5303
662.32	-0.00668848	-0.00375293	-0.00281527	-0.00494153	669.932	22.4859	20.2491	22.8666	18.6453
677.545	-0.00401655	-0.00686071	-0.00754957	-0.00494669	685.158	22.9162	20.8563	21.7082	18.4049
692.771	-3.27066e-18	-0.00885163	-0.00734452	-0.00311421	700.384	23.2846	21.4537	20.8744	17.9917
707.997	-0.00150743	-0.00792532	-0.00323086	-0.00151327	715.61	23.466	21.662	20.3536	17.8087
723.223	-0.00228809	-0.00583239	-0.00347053	-0.00291619	730.835	23.2959	21.7589	19.9152	17.6607
738.448	-0.0022612	-0.00327489	-0.00820387	-0.00457459	746.061	22.6826	21.7313	19.5704	17.4269
753.674	-0.00588696	-0.00675737	-0.0075393	-0.00311421	761.287	21.9206	21.2842	19.0526	17.3265
768.9	-0.00497641	-0.00524156	-0.00291097	-0.00153305	776.513	21.1716	20.8363	18.4849	17.1299
784.126	-0.00101893	-0.00365341	-0.00327489	-0.00184994	791.738	20.5663	20.7971	18.425	16.9527
799.351	-0.00213617	-0.00164349	-0.00319457	-0.00342965	806.964	20.2539	20.7971	18.766	16.8313
814.577	-0.0031759	-3.27026e-18	-0.0016079	-0.00160602	822.19	20.3172	21.0715	19.2882	16.7239
829.803	-0.00436968	-0.00375293	-0.000284646	-0.00600583	837.416	20.4873	21.6252	19.9782	16.7474
845.028	-0.00544273	-0.00739216	-0.00372322	-0.00749099	852.641	20.5886	22.4643	20.6401	16.8849
860.254	-0.00853844	-0.00875288	-0.00977414	-0.00309218	867.867	20.4558	23.2036	20.2842	16.9195
875.48	-0.00803446	-0.00263058	-0.00756777	-0.00511894	883.093	20.3025	23.9657	19.7053	16.7329
890.706	-0.00587681	-0.0031503	-0.00350455	-0.00716503	898.319	20.2625	24.5644	19.2159	16.8226
905.931	-0.00323086	-0.00744065	-0.00735131	-0.00575262	913.544	19.7189	24.7244	18.713	17.0046
921.157	0.0015086	-0.00449172	-0.0066866	-0.00321395	928.77	19.4304	24.1345	17.9594	17.3661
936.383	-0.00346617	0.000100327	-0.00543325	-0.0010054	943.996	19.4124	23.2433	17.7855	18.1348
951.609	-0.00651769	0.00222594	-0.00414316	-0.00319479	959.222	19.5423	23.0196	17.8649	18.9355
966.834	-0.00173474	-0.00614909	-0.000928656	-0.0082293	974.447	19.4998	23.1292	17.8789	19.5035
982.06	-0.00308292	-0.00594119	-0.00121368	-0.00721019	989.673	19.8186	23.2037	18.0934	19.8579
997.286	-0.00452079	-0.00146332	-2.12901e-18	-0.00593946	1004.9	20.461	23.7614	18.781	20.1464
1012.51	-0.00443423	-0.00443048	-2.62033e-18	-0.002949	1020.12	20.9862	24.414	19.4319	20.0353
