# Supplementary material for: Retrograde ERK activation waves drive base-to-apex multicellular flow in murine cochlear duct morphogenesis
Source: eLife. 2021 Mar 5;10:e61092. doi: 10.7554/eLife.61092 (PMC7935486; doi:10.7554/eLife.61092)
Supplement: Figure 1—source data 2. [file elife-61092-fig1-data2.xlsx]

## Sheet: floor
	Lateral									Medial
Apex	0.40046	0.260779	0.342616	0.41402	0.333496	0.154395	0.266245	0.0956656	0.0724599	0.136002
	0.336028	0.248011	0.150004	0.17468	0.218801	0.153806	0.160182	0.124856	0.124626	0.135541
	0.21163	0.192324	0.121134	0.0842277	0.0517212	0.0913698	0.0683771	0.0939549	0.0955174	0.0997662
	0.269578	0.217083	0.1176	0.0651663	0.048095	0.048502	0.0415581	0.0569456	0.105901	0.0719729
	0.423976	0.244337	0.0959201	0.0850276	0.0547229	0.0601434	0.0450399	0.0796067	0.0775517	0.112203
	0.374435	0.253992	0.113261	0.0845972	0.0657088	0.0626037	0.0720531	0.124742	0.226855	0.16373
	0.23037	0.291285	0.127946	0.0886638	0.0723199	0.0597564	0.113671	0.223663	0.32273	0.198706
	0.31619	0.244168	0.11896	0.114336	0.0659809	0.0654628	0.0951924	0.196913	0.361919	0.250305
	0.235538	0.208253	0.112278	0.133179	0.0805485	0.0663512	0.0663461	0.166549	0.339599	0.299433
	0.177352	0.211128	0.113805	0.132143	0.0993813	0.0587966	0.0705076	0.226342	0.443631	0.391453
	0.182947	0.19767	0.160513	0.129052	0.0740697	0.0680219	0.0654959	0.198294	0.423467	0.450473
	0.138791	0.221642	0.213146	0.142058	0.116293	0.0735895	0.0647531	0.240681	0.542284	0.544263
	0.18063	0.229681	0.237993	0.193165	0.139053	0.0734328	0.0670681	0.232002	0.475316	0.599361
	0.20825	0.237663	0.225725	0.233508	0.176221	0.104411	0.0911463	0.271578	0.614433	0.662792
	0.262455	0.403332	0.315078	0.317125	0.230894	0.142915	0.111625	0.280281	0.596723	0.803389
	0.393216	0.501785	0.428608	0.287066	0.30246	0.2395	0.173765	0.351716	0.774872	0.673615
	0.400918	0.677173	0.486057	0.393673	0.357595	0.262304	0.291079	0.376919	0.71783	0.732358
	0.574987	0.755508	0.522236	0.416283	0.444264	0.394879	0.391639	0.442574	0.682924	0.781714
	0.416449	0.778296	0.655357	0.562397	0.497386	0.472993	0.396134	0.451098	0.668497	0.776255
Base	0.686792	0.727991	0.537286	0.518814	0.454839	0.46467	0.364546	0.418657	0.545996	0.652958

## Sheet: roof
	Lateral									Medial
Apex	0.367885	0.426889	0.396398	0.284618	0.363257	0.204723	0.201284	0.325532	0.245879	0.151045
	0.599178	0.420199	0.437916	0.358785	0.388335	0.502555	0.384246	0.561788	0.249322	0.244558
	0.514341	0.451331	0.42401	0.334598	0.252624	0.182423	0.186888	0.183594	0.289216	0.492014
	0.68523	0.599903	0.383059	0.55367	0.364101	0.284545	0.248436	0.173643	0.231021	0.388018
	0.636098	0.49451	0.446935	0.368181	0.369571	0.37131	0.351812	0.281577	0.158254	0.239287
	0.517322	0.432172	0.434805	0.397513	0.415747	0.388121	0.363735	0.296818	0.175352	0.252379
	0.550275	0.381609	0.409385	0.465675	0.350127	0.303506	0.396685	0.392962	0.324486	0.224008
	0.487274	0.451852	0.411445	0.326032	0.31067	0.257585	0.295328	0.415725	0.664579	0.482385
	0.421056	0.425264	0.42569	0.356502	0.347317	0.195411	0.310049	0.336199	0.404532	0.556097
	0.286574	0.312133	0.275869	0.30227	0.231213	0.185109	0.268285	0.368349	0.342616	0.765777
	0.266131	0.319628	0.200831	0.305868	0.26953	0.207952	0.252826	0.245638	0.387973	0.727752
	0.2376	0.363135	0.299539	0.266106	0.227364	0.200192	0.183477	0.270954	0.248725	0.849509
	0.286833	0.305422	0.33845	0.320513	0.264656	0.248549	0.226423	0.228829	0.286621	0.666288
	0.228747	0.208517	0.222443	0.242135	0.264215	0.369235	0.174291	0.162992	0.192988	0.708339
	0.230536	0.150685	0.188214	0.31127	0.391594	0.304397	0.194176	0.111554	0.244557	0.582855
	0.303054	0.188452	0.24826	0.212557	0.325018	0.285444	0.191228	0.227073	0.244762	0.591329
	0.281644	0.221097	0.207292	0.312723	0.368476	0.153896	0.218463	0.1381	0.206866	0.645928
	0.321404	0.296604	0.200873	0.255418	0.274057	0.341093	0.179228	0.214959	0.20114	0.608927
	0.450446	0.301925	0.191716	0.311806	0.412982	0.433452	0.371281	0.18121	0.262341	0.421478
Base	0.445962	0.189128	0.210105	0.399257	0.422569	0.245448	0.346948	0.189264	0.305916	0.147782
