# Supplementary material for: Retrograde ERK activation waves drive base-to-apex multicellular flow in murine cochlear duct morphogenesis
Source: eLife. 2021 Mar 5;10:e61092. doi: 10.7554/eLife.61092 (PMC7935486; doi:10.7554/eLife.61092)
Supplement: Figure 1—source data 3. [file elife-61092-fig1-data3.xlsx]

## Sheet: Floor
	Relative position (Lateral -> Medial)	Cell number	Area [µm^2]	Density[cells/µm^2]	Cell area [µm^2]
Sample1
ROI1	0.2706	121	2994.48	0.0404076	24.7478
ROI2	0.4066	126	3042.62	0.0414117	24.1478
ROI3	0.5439	132	3337.09	0.0395554	25.281
ROI4	0.6737	116	2994.48	0.0387379	25.8145
ROI5	0.7791	90	2848.46	0.031596	31.6496
Sample2
ROI1	0.2436	176	4690.54	0.0375224	26.6508
ROI2	0.3646	187	4893.59	0.0382132	26.1689
ROI3	0.4999	178	4616.51	0.0385572	25.9355
ROI4	0.6016	195	5493.06	0.0354994	28.1695
ROI5	0.73	175	4627.03	0.0378212	26.4402
Sample3
ROI1	0.2271	169	5678.72	0.0297602	33.6019
ROI2	0.3579	179	5335.71	0.0335476	29.8084
ROI3	0.5131	197	6051.26	0.0325552	30.7171
ROI4	0.6372	211	6257.55	0.0337192	29.6566
ROI5	0.7945	238	7170.1	0.0331934	30.1265

## Sheet: Roof
	Relative position (Lateral -> Medial)	Cell number	Area [µm^2]	Density[cells/µm^2]	Cell area [µm^2]
Sample1
ROI1	0.2069	168	4457.55	0.0376889	26.533
ROI2	0.3024	190	4474.13	0.0424664	23.5481
ROI3	0.4627	191	4797.32	0.0398139	25.1169
ROI4	0.6011	195	5539.98	0.0351987	28.4101
ROI5	0.7394	176	4860.42	0.0362108	27.616
Sample2
ROI1	0.2687	190	5331.66	0.0356362	28.0614
ROI2	0.3656	194	5249.14	0.0369584	27.0574
ROI3	0.5071	235	6271.31	0.0374723	26.6864
ROI4	0.6459	231	6733.24	0.0343074	29.1482
ROI5	0.7774	212	7060.88	0.0300246	33.306
Sample3
ROI1	0.1894	131	3613.36	0.0362543	27.5829
ROI2	0.3168	133	3300.28	0.0402996	24.8142
ROI3	0.4472	114	2822.17	0.0403945	24.7559
ROI4	0.5652	117	3094.8	0.0378054	26.4513
ROI5	0.7081	123	3388.46	0.0362996	27.5485
