# Supplementary material for: Retrograde ERK activation waves drive base-to-apex multicellular flow in murine cochlear duct morphogenesis
Source: eLife. 2021 Mar 5;10:e61092. doi: 10.7554/eLife.61092 (PMC7935486; doi:10.7554/eLife.61092)
Supplement: Figure 2—source data 1. [file elife-61092-fig2-data1.xlsx]

## Sheet: Sheet1
Treatment	Sample ID	Longitudinal length [µm]
DMSO	Sample1	1859.35
DMSO	Sample2	1941.7
DMSO	Sample3	1903.94
PD0325901	Sample1	1146.44
PD0325901	Sample2	1287.02
PD0325901	Sample3	1495.63
SU5402	Sample1	947.955
SU5402	Sample2	866.97
SU5402	Sample3	800.53
SU5402	Sample4	878.561
