# Supplementary material for: Retrograde ERK activation waves drive base-to-apex multicellular flow in murine cochlear duct morphogenesis
Source: eLife. 2021 Mar 5;10:e61092. doi: 10.7554/eLife.61092 (PMC7935486; doi:10.7554/eLife.61092)
Supplement: Figure 2—source data 2. [file elife-61092-fig2-data2.xlsx]

## Sheet: Sheet
Treatment	Sample ID	Arc length	Curvature
DMSO	1	113.745	0.00822473
DMSO	1	189.575	0.00641775
DMSO	1	265.405	0.00692752
DMSO	1	341.235	0.00622398
DMSO	1	417.065	0.0060101
DMSO	1	492.895	0.00695022
DMSO	1	568.725	0.00783131
DMSO	1	644.555	0.00717423
DMSO	1	720.385	0.00655147
DMSO	1	796.215	0.0064002
DMSO	1	872.045	0.00532071
DMSO	1	947.875	0.00344889
DMSO	1	1023.71	0.003127
DMSO	1	1099.54	0.00373834
DMSO	1	1175.37	0.00390613
DMSO	1	1251.19	0.00359487
DMSO	1	1327.03	0.00371648
DMSO	1	1402.86	0.00387957
DMSO	1	1478.68	0.00347938
DMSO	1	1554.52	0.00303036
DMSO	1	1630.35	0.00289423
DMSO	1	1706.17	0.00245263
DMSO	2	113.745	0.00544128
DMSO	2	189.575	0.00720166
DMSO	2	265.405	0.0062959
DMSO	2	341.235	0.00605136
DMSO	2	417.065	0.00587851
DMSO	2	492.895	0.00536505
DMSO	2	568.725	0.00513106
DMSO	2	644.555	0.00461675
DMSO	2	720.385	0.0039792
DMSO	2	796.215	0.00393761
DMSO	2	872.045	0.00384054
DMSO	2	947.875	0.00345279
DMSO	2	1023.71	0.00354648
DMSO	2	1099.54	0.00383593
DMSO	2	1175.37	0.00352115
DMSO	2	1251.19	0.00289569
DMSO	2	1327.03	0.00269468
DMSO	2	1402.86	0.0027615
DMSO	2	1478.68	0.00261063
DMSO	2	1554.52	0.00209069
DMSO	2	1630.35	0.00168509
DMSO	2	1706.17	0.0014779
DMSO	2	1782.01	0.00132331
DMSO	3	113.745	0.0119631
DMSO	3	189.575	0.00691475
DMSO	3	265.405	0.00714378
DMSO	3	341.235	0.00567774
DMSO	3	417.065	0.00508863
DMSO	3	492.895	0.00446192
DMSO	3	568.725	0.00381269
DMSO	3	644.555	0.00342265
DMSO	3	720.385	0.00347383
DMSO	3	796.215	0.0038256
DMSO	3	872.045	0.00405025
DMSO	3	947.875	0.00371195
DMSO	3	1023.71	0.00314432
DMSO	3	1099.54	0.00277646
DMSO	3	1175.37	0.00265941
DMSO	3	1251.19	0.00280703
DMSO	3	1327.03	0.00287813
DMSO	3	1402.86	0.00288506
DMSO	3	1478.68	0.00293323
DMSO	3	1554.52	0.00321353
DMSO	3	1630.35	0.00342638
DMSO	3	1706.17	0.00383102
DMSO	3	1782.01	0.00397219
PD0325901	1	113.745	0.0149594
PD0325902	1	189.575	0.0135657
PD0325903	1	265.405	0.0111688
PD0325904	1	341.235	0.00883861
PD0325905	1	417.065	0.00738015
PD0325906	1	492.895	0.00556523
PD0325907	1	568.725	0.00415251
PD0325908	1	644.555	0.00376072
PD0325909	1	720.385	0.00429552
PD0325910	1	796.215	0.00420481
PD0325911	1	872.045	0.0034507
PD0325912	1	947.875	0.00370974
PD0325913	1	1023.71	0.00142885
PD0325914	2	113.745	0.0149594
PD0325915	2	189.575	0.0135657
PD0325916	2	265.405	0.0111688
PD0325917	2	341.235	0.00883861
PD0325918	2	417.065	0.00738015
PD0325919	2	492.895	0.00556523
PD0325920	2	568.725	0.00415251
PD0325921	2	644.555	0.00376072
PD0325922	2	720.385	0.00429552
PD0325923	2	796.215	0.00420481
PD0325924	2	872.045	0.0034507
PD0325925	2	947.875	0.00370974
PD0325926	2	1023.71	0.00142885
PD0325927	3	113.745	0.0114197
PD0325928	3	189.575	0.00878526
PD0325929	3	265.405	0.0084725
PD0325930	3	341.235	0.00761734
PD0325931	3	417.065	0.00681754
PD0325932	3	492.895	0.00582593
PD0325933	3	568.725	0.00552333
PD0325934	3	644.555	0.00494575
PD0325935	3	720.385	0.00408603
PD0325936	3	796.215	0.00413508
PD0325937	3	872.045	0.00417802
PD0325938	3	947.875	0.0032438
PD0325939	3	1023.71	0.00272756
PD0325940	3	1099.54	0.00275736
PD0325941	3	1175.37	0.0025248
PD0325942	3	1251.19	0.00285972
PD0325943	3	1327.03	0.00295977
SU5402	1	113.745	0.0115104
SU5403	1	189.575	0.00855312
SU5404	1	265.405	0.00725723
SU5405	1	341.235	0.00632225
SU5406	1	417.065	0.00604284
SU5407	1	492.895	0.00607894
SU5408	1	568.725	0.00615518
SU5409	1	644.555	0.00582472
SU5410	1	720.385	0.00518763
SU5411	1	796.215	0.00432937
SU5412	2	113.745	0.0101569
SU5413	2	189.575	0.00726341
SU5414	2	265.405	0.00700073
SU5415	2	341.235	0.00600007
SU5416	2	417.065	0.0064573
SU5417	2	492.895	0.00639326
SU5418	2	568.725	0.00542766
SU5419	2	644.555	0.00548781
SU5420	2	720.385	0.00286413
SU5421	3	113.745	0.00915423
SU5422	3	189.575	0.00798744
SU5423	3	265.405	0.00711117
SU5424	3	341.235	0.00646835
SU5425	3	417.065	0.00580439
SU5426	3	492.895	0.00525398
SU5427	3	568.725	0.00489211
SU5428	3	644.555	0.00376536
SU5429	4	113.745	0.0112382
SU5430	4	189.575	0.00847026
SU5431	4	265.405	0.00719005
SU5432	4	341.235	0.00647148
SU5433	4	417.065	0.00670401
SU5434	4	492.895	0.00681208
SU5435	4	568.725	0.00634406
SU5436	4	644.555	0.00629942
SU5437	4	720.385	0.00302258
