# Supplementary material for: Retrograde ERK activation waves drive base-to-apex multicellular flow in murine cochlear duct morphogenesis
Source: eLife. 2021 Mar 5;10:e61092. doi: 10.7554/eLife.61092 (PMC7935486; doi:10.7554/eLife.61092)
Supplement: Figure 3—source data 1. [file elife-61092-fig3-data1.xlsx]

## Sheet: ERK_activity_rate
	ERK activity rate [/min]
Time [min]	Region1	Region2	Region3	Region4	Region5	Region6	Region7	Region8	Region9	Region10	Region11	Region12
0	-0.00098266	-0.00069786	-0.001303	0.00024533	-8.1844e-05	0.00082644	-0.00049265	-0.0011481	-0.00046978	-0.00041126	-0.00052648	0.00017429
12	-0.00082836	-0.00049139	-0.00038828	0.00068473	0.00021511	0.00063267	-0.00043238	-0.00073371	-0.00013384	0.00013059	0.00015065	0.00031303
24	-0.00063863	-0.00030016	-3.0956e-05	0.00071059	0.00046571	0.00062085	-0.00039545	-0.0004706	1.6798e-06	0.00029178	0.00035746	0.00036842
36	-0.00048923	-0.00022063	0.00041676	0.00082079	0.00066363	0.00060542	-0.00031251	-0.00033879	9.8375e-05	0.00055395	0.00063566	0.00046258
48	-0.00033513	-8.2416e-05	0.0005028	0.00067813	0.00079997	0.00075822	-0.00019068	-0.00022971	0.00013759	0.00064208	0.00068494	0.0006632
60	-0.00012484	0.00016867	0.00060961	0.00062654	0.00076386	0.00074055	-0.00011439	-2.5472e-05	0.00021592	0.00057825	0.00065799	0.00067177
72	-0.00010039	0.00025077	0.000612	0.00061625	0.00066416	0.00074571	3.7969e-05	6.0791e-05	0.00029581	0.00053182	0.00055684	0.00071026
84	6.1486e-05	0.00032226	0.00076396	0.00075553	0.00065359	0.00083792	4.5613e-05	8.713e-05	0.00030529	0.00060596	0.00067674	0.00072623
96	0.00016514	0.00061047	0.00076085	0.00068784	0.00069529	0.00069136	-8.9843e-06	0.00034616	0.00049415	0.00049272	0.00061363	0.00064502
108	0.00016301	0.00063534	0.00070546	0.00076782	0.00050477	0.00020517	-0.00019575	0.00035905	0.00048823	0.00045964	0.00060703	0.00022396
120	0.00012184	0.00064462	0.00096945	0.000887	0.00056359	-0.00021329	-0.0002246	0.0003501	0.00063699	0.00058454	0.00070631	8.7227e-06
132	0.00025457	0.00076766	0.00099179	0.00076728	0.00040876	-0.00078692	-0.00024766	0.00043832	0.000701	0.00057802	0.00068235	-0.00027774
144	0.00015321	0.000743	0.00078817	0.00056965	0.0001777	-0.0013656	-0.00032522	0.00036774	0.00067166	0.0005418	0.00042681	-0.00058556
156	0.00026215	0.00058664	0.00063455	0.00065087	-0.00021322	-0.0015969	-0.0001229	0.00032431	0.0005446	0.00054269	0.00031881	-0.00079541
168	0.00042162	0.0006347	0.00076246	0.00052611	-0.00038312	-0.0015371	0.00022069	0.00051265	0.00073051	0.0006965	3.7457e-05	-0.00081276
180	0.00062523	0.00063049	0.00040468	0.00031254	-0.00078823	-0.0014769	0.00047029	0.0005946	0.00067686	0.00057882	-0.0003059	-0.0009098
192	0.00071343	0.00060056	0.00035073	0.00018764	-0.00095947	-0.0013123	0.00055568	0.00065601	0.00068131	0.00060897	-0.0004213	-0.00096288
204	0.00091503	0.00069538	0.00040489	0.00010061	-0.0010803	-0.00099748	0.00079419	0.00079283	0.00077292	0.00055791	-0.00047552	-0.00083465
216	0.00082599	0.00070692	0.00045059	-0.00026605	-0.0012537	-0.00096747	0.0007346	0.00068221	0.00086243	0.0005069	-0.00070175	-0.00087897
228	0.00081515	0.00062208	0.00016023	-0.00051144	-0.0013002	-0.00080855	0.00064785	0.00057111	0.00059514	8.4703e-05	-0.00074152	-0.00082619
240	0.00073915	0.00059828	5.6722e-05	-0.00080257	-0.0012047	-0.00073507	0.00047229	0.00051388	0.0004195	-0.00014878	-0.0007799	-0.0008183
252	0.00070423	0.00051948	-0.00022491	-0.0010023	-0.0011593	-0.00063816	0.00046336	0.00044426	0.0002329	-0.00045281	-0.00092024	-0.00087552
264	0.00078402	0.00049741	-0.00040712	-0.0013142	-0.0011276	-0.00067252	0.00055818	0.00053661	0.00019873	-0.00068455	-0.0011123	-0.00091868
276	0.00098083	0.00055791	-0.00065757	-0.0014242	-0.00086536	-0.00056049	0.00070147	0.00072581	4.5902e-05	-0.00087067	-0.001035	-0.00087042
288	0.0011046	0.00043474	-0.00071063	-0.0012754	-0.00068381	-0.0005793	0.00083992	0.00072645	-1.117e-06	-0.00080629	-0.00085967	-0.00081751
300	0.0011329	0.00019733	-0.00075498	-0.0011225	-0.00052385	-0.00055953	0.0010305	0.000711	-0.00017996	-0.00082741	-0.00072369	-0.00070721
312	0.0011845	-2.1353e-05	-0.00058344	-0.00097349	-0.00040601	-0.00041231	0.0012527	0.00068025	-0.000293	-0.00077365	-0.00059719	-0.00046472
324	0.00092664	-0.00035874	-0.00064331	-0.00058236	-0.00021863	-0.00039742	0.0011258	0.00036247	-0.00065145	-0.00080726	-0.00032511	-0.00046226
336	0.00064727	-0.00073313	-0.00063003	-0.00027852	-9.3823e-05	-0.00032763	0.00099253	0.00011619	-0.00091167	-0.00080603	-0.00014344	-0.00028539
348	0.00011905	-0.00093321	-0.00056724	-0.00038413	-6.6077e-05	-0.00026802	0.00065978	-0.00021241	-0.00098082	-0.0008257	-0.00027707	-0.00019748
360	-0.00029704	-0.0010167	-0.00049831	-0.00030861	-0.00012009	-0.00018525	0.00027661	-0.0005585	-0.00093357	-0.00066841	-0.00022008	-0.00017077
372	-0.00086233	-0.0010856	-0.00068174	-0.00029386	-8.0006e-05	-0.0002597	-0.00020761	-0.00087786	-0.0009553	-0.00068558	-0.00019489	-0.0002315
384	-0.0011891	-0.00109	-0.00070119	-0.00046099	-0.00015927	-0.00011358	-0.00048881	-0.0010581	-0.00090136	-0.0005553	-0.00026229	-2.5102e-05
396	-0.0016582	-0.0011174	-0.00061852	-0.00056705	-0.00033768	-8.2521e-05	-0.00079039	-0.0013185	-0.00079602	-0.00046093	-0.00046581	-9.6824e-05
408	-0.0016431	-0.00094832	-0.00065162	-0.00038791	-0.00034229	-7.0257e-05	-0.00089514	-0.0012598	-0.00073696	-0.00038471	-0.00034034	-9.0774e-05
420	-0.0015852	-0.00088632	-0.00063888	-0.00037492	-0.00026869	1.7475e-05	-0.00086232	-0.0010646	-0.00062083	-0.00050452	-0.00049036	2.0992e-05
432	-0.0013213	-0.00073543	-0.00042957	-0.0003611	-0.0003636	6.2143e-05	-0.00079702	-0.00093706	-0.00049763	-0.00033946	-0.00055704	4.1357e-05
444	-0.0011086	-0.00060366	-0.0002531	-0.00028212	-0.00030186	5.1331e-05	-0.00081064	-0.00070834	-0.000375	-0.00035004	-0.00045757	-7.891e-05
456	-0.00057558	-0.00031628	-0.00028357	-0.00023748	-0.00023866	-3.0525e-05	-0.00070696	-0.00038309	-0.0002528	-0.00035083	-0.00030662	-3.9685e-05
468	-0.00043514	-0.00033576	-0.00023325	-0.00043769	-0.00040299	3.6337e-06	-0.00064486	-0.00029794	-0.00028272	-0.00039832	-0.00050523	-0.00017868
480	-0.00027837	-0.00010084	-0.00018803	-0.00039848	-0.00044469	-0.00012686	-0.00059379	-0.00026427	-0.00026815	-0.00020375	-0.00030405	-0.00033305
492	-0.00019813	-1.6157e-06	-0.00024519	-0.00035928	-0.00035728	-0.00020949	-0.00057589	-0.00011829	-0.00017964	-0.00026927	-0.00012668	-0.00033531
504	-3.7089e-05	0.00020677	-0.00026676	-0.00034798	-0.00031985	-0.00022136	-0.00045134	1.9274e-05	-2.2825e-05	-0.0002222	-0.00023961	-0.00029125
516	-2.882e-05	0.00026238	-8.554e-05	-0.00033123	-0.00024174	-0.00017921	-0.00032575	8.2939e-05	5.4037e-05	-0.00010722	-0.00018759	-0.00021839
528	0.00020479	0.00048717	-4.9177e-06	-9.8813e-05	-1.0165e-05	-0.0001745	-0.00018916	0.00027229	0.00027534	5.3744e-06	0.00011988	-2.0742e-05
540	0.00037112	0.00043249	7.3306e-05	-4.4696e-05	1.957e-05	-2.624e-05	-0.00011219	0.00044343	0.00035316	-2.3155e-05	7.4138e-05	0.00010755
552	0.00055026	0.00037488	5.8922e-05	-4.3399e-06	4.1929e-05	0.00017348	0.00013298	0.00053015	0.0002383	-3.976e-05	-4.3193e-05	0.00019496
564	0.00061294	0.00022568	0.00015778	8.2496e-05	9.3013e-05	0.00024555	0.00032011	0.00046012	0.00012277	9.552e-05	8.6435e-05	0.00028281
576	0.0005512	4.9106e-05	3.3388e-05	0.00012646	2.897e-05	0.00032517	0.00035364	0.00033447	3.5727e-06	4.6609e-05	2.2135e-05	0.00016091
588	0.00037444	-0.00021658	-6.4225e-05	9.1924e-06	-9.6632e-05	0.00014897	0.0004593	0.00010598	-0.00019671	-5.1004e-06	-0.00012909	1.7129e-06
600	0.00023783	-0.0003116	-0.0003008	-0.00020897	-0.00019499	8.8925e-05	0.00055352	-0.00013689	-0.00038309	-0.00017736	-0.0001885	-0.00012383
612	5.404e-05	-0.00028987	-0.00025778	-0.000272	-0.00023042	-2.2753e-05	0.00043629	-0.00025541	-0.00039416	-9.9756e-05	-0.00011396	-0.00018894
624	-0.00011996	-0.00042129	-0.00048306	-0.00041272	-0.00044051	-0.0001551	0.00028861	-0.0004147	-0.00042023	-0.00029406	-0.00022748	-0.0003698
636	-0.00013234	-0.00035231	-0.00048395	-0.00039648	-0.00031092	-0.00020612	0.00023726	-0.00041125	-0.00031186	-0.00030654	-0.00019126	-0.00026535
648	-0.00010403	-0.00025865	-0.00049683	-0.00027022	-0.00012037	2.8736e-05	0.00014123	-0.00029018	-0.0002683	-0.00030037	-4.4711e-05	-7.5298e-05
660	-0.00018979	-0.00035372	-0.00030995	2.0199e-05	0.00018374	0.00012425	5.1412e-05	-0.00024804	-0.00018675	-8.9493e-05	9.0046e-05	0.00013861
672	-0.00027994	-0.00048786	-0.00035098	0.00011609	0.00033294	0.00027412	-6.1286e-05	-0.00039548	-0.0001152	-0.0001181	0.00015438	0.00019866
684	-0.00031392	-0.00036701	-0.00019872	0.00030395	0.00076633	0.00046086	-0.00014822	-0.0003431	-0.00012043	7.2576e-06	0.00037468	0.00045473
696	-0.00041306	-0.00050439	-0.00021261	0.00025338	0.00079416	0.00057235	-0.00013998	-0.00038136	-0.00025994	-6.0288e-06	0.00036297	0.00045119
708	-0.00053156	-0.00058406	-0.00014408	0.00035739	0.00085411	0.00065493	-0.00024867	-0.00052168	-0.0003237	7.7133e-05	0.00043203	0.0004788
720	-0.00053844	-0.00050625	-6.9262e-05	0.00028816	0.00082385	0.0006319	-0.0003431	-0.00054472	-0.00022928	0.00010572	0.00048724	0.00046505
732	-0.00050154	-0.00042088	0.0001182	0.00041871	0.00090206	0.00066752	-0.00031939	-0.00037818	-0.00017602	0.0002624	0.00050481	0.00055952
744	-0.00054367	-0.00046631	0.0001142	0.00041006	0.00073464	0.00063428	-0.00027467	-0.00026386	-0.00013333	0.00026432	0.00046851	0.00053782
756	-0.00048805	-0.00021699	0.00028464	0.00061649	0.00084969	0.00057634	-0.0004047	-0.00019836	3.5917e-05	0.00037529	0.00064444	0.0006659
768	-0.00046743	-5.0934e-05	0.00040318	0.00054291	0.00075116	0.00041127	-0.00045186	-0.00010027	0.00025293	0.00036949	0.00053608	0.00061708
780	-0.00044656	0.00010531	0.00031241	0.00058725	0.0006578	0.00035838	-0.00053275	-4.5744e-05	0.00020807	0.00028378	0.00046091	0.00052396
792	-0.00047034	0.00025754	0.00023977	0.00049261	0.00042341	5.3346e-05	-0.00059024	-7.397e-05	0.00025307	0.00024507	0.00041668	0.00030133
804	-0.00032948	0.00046447	0.00041039	0.00058883	0.00036707	-3.2981e-05	-0.00065988	-0.00014232	0.0003908	0.00029532	0.00045653	0.00017822
816	-0.00032059	0.00047677	0.00045776	0.0005376	4.1342e-05	-6.6246e-05	-0.00065381	-0.00010799	0.00043768	0.00034136	0.00033029	-6.0897e-05
828	-0.00015841	0.00061117	0.0005112	0.00056686	1.2512e-05	-9.2505e-05	-0.0005549	6.9219e-05	0.00045376	0.00041846	0.00028064	-8.5337e-05
840	4.206e-05	0.00073881	0.00076189	0.00067196	-3.5113e-05	-0.00022646	-0.00042411	0.00033566	0.00059483	0.00065708	0.00025804	-0.00018934
852	0.000291	0.00081273	0.0009268	0.00066548	-1.7744e-05	-0.00011435	-0.00030174	0.00045727	0.00070024	0.00065821	0.00026846	-3.2254e-05
864	0.00041723	0.00093581	0.00099619	0.00060065	-0.00016232	-0.00025343	-0.00013845	0.00069258	0.00082836	0.00079801	4.7562e-05	-0.00018792
876	0.00055633	0.0010663	0.0010787	0.00058287	-6.2843e-05	-0.00039307	6.607e-05	0.00085755	0.00086443	0.00083075	1.3347e-05	-0.00013594
888	0.00066538	0.0011253	0.0011475	0.00047823	-0.00017572	-0.00041112	0.00018556	0.00090504	0.00093456	0.00088168	5.5098e-05	-0.00028359
900	0.0007296	0.0011282	0.0011762	0.00037911	-0.00022794	-0.00040506	0.00037847	0.00080603	0.00097199	0.00077747	0.0001896	-0.0001474
912	0.00088968	0.0012421	0.0011374	0.0003751	-0.00018129	-0.00045147	0.0006071	0.00095256	0.00093457	0.00083188	0.00013313	-0.00028389
924	0.0010052	0.0011917	0.00096663	0.00013648	-0.00022853	-0.00046226	0.00070931	0.0010079	0.0007856	0.00059512	0.00015499	-0.00018088
936	0.0012334	0.0011658	0.00088157	2.4537e-05	-0.0003359	-0.00047307	0.00086057	0.0010921	0.00081145	0.00058892	0.00011331	-0.00021766
948	0.0013766	0.0011114	0.00078427	1.5085e-05	-0.0004521	-0.00063445	0.0010689	0.0011512	0.00072452	0.00047452	-1.9729e-05	-0.00023181
960	0.001465	0.0010009	0.00051552	-0.00030339	-0.00055677	-0.00059074	0.0011464	0.0011795	0.00065457	0.00026573	-0.00035973	-0.00036567
972	0.0013583	0.00077769	0.00026679	-0.00044646	-0.00074761	-0.00071991	0.0010922	0.0010949	0.00052039	5.355e-05	-0.00049275	-0.00045131
984	0.0012915	0.00062901	0.00014758	-0.0003102	-0.00071512	-0.00049477	0.0011567	0.00086165	0.00039365	7.5051e-05	-0.00049933	-0.00043787
996	0.0011623	0.00049015	-0.00021326	-0.00043801	-0.00067362	-0.00038291	0.0011537	0.00066466	0.0001821	-0.00029749	-0.00058376	-0.00034737
1008	0.00099828	0.000255	-0.00056639	-0.0005523	-0.00047736	-0.00014467	0.0009653	0.00038841	-2.5393e-06	-0.0005417	-0.00055144	-0.00023575
1020	0.00085187	0.00014007	-0.00071457	-0.0002936	-0.0003785	-0.0001166	0.00090441	0.00027393	-0.0001875	-0.00055157	-0.00039795	-0.00024717
1032	0.00069204	-9.1482e-05	-0.00071083	-0.00029996	-0.00020447	0.00027623	0.00088098	5.7187e-05	-0.0003387	-0.00055659	-0.00024274	8.3982e-05
1044	0.00059741	-0.00039107	-0.00079381	-0.00043786	-0.00012168	0.00011511	0.00080306	2.8364e-05	-0.00048024	-0.00068609	-0.00022713	0.00014445
1056	0.00032812	-0.00075635	-0.00070927	-0.00035618	-5.8724e-05	8.8483e-05	0.00070492	-0.00015449	-0.00060097	-0.0005601	-0.00010334	2.2867e-05
1068	6.0531e-05	-0.00086875	-0.00052883	-0.00028338	-0.00011049	0.00016653	0.00069372	-0.0001874	-0.00060792	-0.00042243	-0.00011085	8.2207e-05
1080	-0.00026428	-0.0010041	-0.00053129	-0.00048245	-9.5955e-05	0.00025365	0.00052254	-0.00032234	-0.00066486	-0.00045081	-0.00010576	0.00024325
1092	-0.00044981	-0.00093003	-0.00058892	-0.00046189	-4.3356e-05	-2.5048e-05	0.00033989	-0.00033785	-0.0005728	-0.00048492	-0.00013315	-2.4234e-05
1104	-0.00065846	-0.00072014	-0.00059518	-0.00045601	4.7355e-05	0.00016827	0.00023337	-0.00037107	-0.00043141	-0.00051109	-6.4712e-05	-2.1492e-05
1116	-0.0005819	-0.00041351	-0.00057675	-0.00048128	9.8011e-05	0.00036066	-6.4845e-06	-0.00024644	-0.00029104	-0.00045362	-8.8033e-05	8.8997e-05
1128	-0.0004796	-0.00033943	-0.00063715	-0.00050807	0.00014157	0.00013678	-0.00015931	-0.00028535	-0.00029122	-0.00040943	6.9531e-05	-4.446e-05
1140	-0.00037175	-0.0003352	-0.00052912	-0.00032211	0.00021276	1.8409e-05	-0.00033829	-0.00032296	-0.00020467	-0.00027837	0.00012393	-0.00013347
1152	-0.00033941	-0.00033134	-0.00046493	-0.00023108	9.53e-05	0.00010308	-0.00043172	-0.00031685	-0.00024848	-0.00023311	0.00014002	-4.2479e-05
1164	-0.00045412	-0.00043894	-0.0002714	-7.742e-05	-4.3413e-05	-0.00020515	-0.00063338	-0.00050255	-0.00027686	-3.5998e-05	0.00015648	-0.00013416
1176	-0.00078564	-0.00054303	-0.00013365	0.00010001	-0.00027688	-0.00027372	-0.00055691	-0.00056577	-0.00039602	-0.00012474	0.00012555	-0.00021601
1188	-0.0011341	-0.00052795	3.6358e-05	0.00025356	-0.00053853	-0.00017667	-0.000541	-0.00057269	-0.00045426	-0.00022231	9.2753e-06	-0.00019621
1200	-0.0016441	-0.00047649	0.00014126	0.00048236	-0.00097346	0.00041338	-0.00016019	-0.00025634	-0.00068971	-0.00064353	-0.00023478	-0.00030065

## Sheet: Extension_shrinkage_rate
	Extension-shrinkage rate [/min]
Time [min]	Region1	Region2	Region3	Region4	Region5	Region6	Region7	Region8	Region9	Region10	Region11	Region12
0	-0.033674	-0.013132	0.069183	0.051363	0.0035224	0.025208	-0.106	-0.028465	-0.014335	0.096531	0.030475	0.0012118
12	-0.038558	-0.01665	0.066113	0.062653	0.0075383	0.014638	-0.081253	-0.040262	0.0039807	0.095496	0.031621	0.001898
24	-0.038095	-0.0078611	0.072619	0.055813	0.008987	0.013079	-0.068421	-0.036506	0.023914	0.089497	0.029107	0.0033927
36	-0.036795	0.00055251	0.080088	0.050329	0.010673	0.010981	-0.055167	-0.032623	0.041505	0.086622	0.028844	0.0051134
48	-0.031672	0.014738	0.089674	0.039063	0.012524	0.011519	-0.047998	-0.022336	0.060065	0.081092	0.027903	0.008079
60	-0.018884	0.030151	0.093009	0.029496	0.015761	0.012555	-0.041051	-0.0053203	0.074714	0.075099	0.030941	0.011422
72	-0.0050568	0.048179	0.095147	0.021677	0.017199	0.011375	-0.035006	0.015409	0.085408	0.072585	0.033145	0.014184
84	0.011969	0.064832	0.090893	0.016025	0.019936	0.0064305	-0.02789	0.039194	0.092352	0.067336	0.038328	0.016749
96	0.030915	0.08053	0.078476	0.012796	0.021038	-0.0022139	-0.019726	0.066224	0.094535	0.0587	0.039638	0.016931
108	0.051389	0.089829	0.062448	0.011092	0.018665	-0.013575	-0.0070274	0.095826	0.08705	0.052147	0.038641	0.013609
120	0.068772	0.093676	0.0491	0.010129	0.013008	-0.027126	0.010174	0.1146	0.077826	0.047896	0.035309	0.0029261
132	0.08605	0.086993	0.034688	0.0075613	0.0050605	-0.034756	0.030076	0.12729	0.064048	0.042897	0.030894	-0.011236
144	0.09657	0.077676	0.022396	0.0060423	-0.0036082	-0.04212	0.050863	0.1289	0.050733	0.039356	0.023663	-0.027828
156	0.10192	0.060995	0.014272	0.0048984	-0.011565	-0.043149	0.0722	0.11981	0.038327	0.038941	0.017876	-0.044028
168	0.097058	0.046333	0.011095	0.0016661	-0.018333	-0.037659	0.086241	0.10033	0.031808	0.038133	0.012546	-0.058185
180	0.086148	0.0316	0.0079225	-0.0028575	-0.023896	-0.030309	0.09197	0.082152	0.028464	0.033749	0.0022248	-0.062826
192	0.069215	0.021911	0.0060128	-0.010184	-0.023512	-0.025832	0.090355	0.061941	0.028514	0.026853	-0.0097525	-0.062611
204	0.052934	0.0127	0.0036627	-0.019721	-0.022189	-0.019502	0.081886	0.04833	0.028117	0.018722	-0.023509	-0.058072
216	0.04136	0.0086146	-0.0020179	-0.032042	-0.020343	-0.014615	0.069106	0.039198	0.029295	0.0058059	-0.037573	-0.05151
228	0.034602	0.0049079	-0.013941	-0.044016	-0.016542	-0.012605	0.059839	0.035122	0.026637	-0.0084637	-0.051377	-0.043546
240	0.030996	0.0016678	-0.03036	-0.053006	-0.011047	-0.0098824	0.051734	0.032985	0.019159	-0.02495	-0.057329	-0.036646
252	0.031071	-0.0028676	-0.050051	-0.054509	-0.0076452	-0.0068809	0.046553	0.033764	0.0093866	-0.043468	-0.057875	-0.029046
264	0.030093	-0.0064972	-0.071576	-0.053025	-0.0047529	-0.0043183	0.043656	0.030399	-0.0015635	-0.063977	-0.052325	-0.023742
276	0.022141	-0.015466	-0.087131	-0.046721	-0.0024406	-0.0018461	0.039769	0.024642	-0.018431	-0.077138	-0.045325	-0.018661
288	0.01438	-0.026616	-0.095294	-0.040703	-0.00074607	0.0011523	0.033871	0.018875	-0.037999	-0.089035	-0.034974	-0.013767
300	0.0073449	-0.039889	-0.094144	-0.034584	6.47e-05	0.0024148	0.030557	0.012586	-0.059518	-0.092296	-0.026354	-0.011698
312	0.0010295	-0.053935	-0.087098	-0.031013	0.000264	0.0021722	0.027931	0.0055956	-0.081594	-0.088712	-0.020536	-0.010478
324	-0.0030049	-0.073617	-0.071523	-0.027096	0.0010637	0.00063237	0.025977	-0.001992	-0.10545	-0.075986	-0.017289	-0.0082127
336	-0.0036734	-0.087866	-0.056586	-0.022874	0.0015214	-0.0032076	0.0267	-0.011408	-0.12187	-0.064387	-0.012259	-0.0064871
348	-0.0083891	-0.097359	-0.041672	-0.013831	0.0013123	-0.0094425	0.025699	-0.026223	-0.12662	-0.048808	-0.0088688	-0.0066945
360	-0.01611	-0.099519	-0.031548	-0.005337	-0.00037338	-0.015122	0.020306	-0.045187	-0.1195	-0.035886	-0.0058667	-0.0070364
372	-0.02878	-0.096409	-0.020669	0.0028547	-0.0032086	-0.018671	0.0094769	-0.065715	-0.10515	-0.023658	-0.0015606	-0.0082368
384	-0.042318	-0.081204	-0.013788	0.0082131	-0.0072736	-0.021197	-0.0044361	-0.081885	-0.081807	-0.016163	0.0036833	-0.01078
396	-0.056583	-0.062824	-0.0056672	0.0096534	-0.012349	-0.022839	-0.021816	-0.092697	-0.056957	-0.0081119	0.0047741	-0.014235
408	-0.063816	-0.045556	0.0021372	0.0057654	-0.019957	-0.02477	-0.037377	-0.094032	-0.036809	-0.002106	0.0021267	-0.017696
420	-0.065287	-0.031565	0.013745	0.0008361	-0.027999	-0.026218	-0.049761	-0.087692	-0.022289	0.0060815	-0.0023668	-0.019883
432	-0.059414	-0.017146	0.023112	-0.0056463	-0.035153	-0.030755	-0.056631	-0.076183	-0.009967	0.013797	-0.0088451	-0.023516
444	-0.051221	-0.0063476	0.03047	-0.013007	-0.043143	-0.036229	-0.058859	-0.062974	0.0005988	0.019708	-0.019572	-0.026973
456	-0.036602	0.0066492	0.031542	-0.02222	-0.049749	-0.042034	-0.056329	-0.045027	0.010927	0.021214	-0.030583	-0.03046
468	-0.023604	0.021549	0.028199	-0.029835	-0.05321	-0.045882	-0.054349	-0.026934	0.021477	0.018903	-0.03866	-0.033289
480	-0.0087293	0.03768	0.016357	-0.038357	-0.054772	-0.051465	-0.050849	-0.0054888	0.032217	0.0071563	-0.046408	-0.036512
492	0.0092241	0.04854	-0.00089216	-0.047298	-0.05722	-0.053999	-0.044942	0.018426	0.037072	-0.0084042	-0.053364	-0.039417
504	0.032368	0.050562	-0.022795	-0.051307	-0.057882	-0.054235	-0.035874	0.040752	0.032427	-0.023478	-0.054749	-0.042801
516	0.052507	0.041456	-0.043967	-0.050439	-0.058285	-0.049439	-0.023039	0.057449	0.018281	-0.036786	-0.053354	-0.043406
528	0.071691	0.022815	-0.063295	-0.049071	-0.057542	-0.041977	-0.002237	0.068394	-0.0035113	-0.047162	-0.05149	-0.042282
540	0.081841	-0.0038846	-0.07756	-0.04583	-0.056231	-0.029284	0.020966	0.066912	-0.03364	-0.049103	-0.047329	-0.039341
552	0.079201	-0.032494	-0.085966	-0.039642	-0.051591	-0.01273	0.041203	0.052654	-0.060949	-0.04829	-0.042679	-0.031755
564	0.060849	-0.057338	-0.084636	-0.03625	-0.044718	0.0087467	0.05475	0.031609	-0.084138	-0.044527	-0.039712	-0.020128
576	0.033346	-0.077311	-0.078192	-0.032659	-0.03486	0.02497	0.058832	0.0041353	-0.099419	-0.039758	-0.034829	-0.0087166
588	0.00046729	-0.088668	-0.069659	-0.029177	-0.02179	0.040206	0.048365	-0.025867	-0.10574	-0.034615	-0.028735	0.0058619
600	-0.030081	-0.090654	-0.060189	-0.02575	-0.0055661	0.05599	0.028312	-0.050995	-0.10093	-0.032349	-0.022123	0.021798
612	-0.056217	-0.085737	-0.050653	-0.022569	0.013233	0.06842	0.0032976	-0.066975	-0.092621	-0.028975	-0.013855	0.037129
624	-0.074672	-0.074905	-0.045254	-0.018074	0.031863	0.076176	-0.022184	-0.077545	-0.078336	-0.027889	-0.0051755	0.052363
636	-0.083703	-0.063285	-0.040479	-0.014751	0.049023	0.08619	-0.045014	-0.079349	-0.065673	-0.025326	0.0030853	0.068539
648	-0.084027	-0.05282	-0.037005	-0.0096094	0.058459	0.092292	-0.060227	-0.073569	-0.055262	-0.021932	0.010848	0.077295
660	-0.080307	-0.04419	-0.032161	-0.0027108	0.065342	0.092229	-0.070169	-0.064879	-0.046051	-0.016342	0.019845	0.082757
672	-0.071006	-0.03748	-0.027091	0.0061328	0.067313	0.090385	-0.07386	-0.056857	-0.037787	-0.010596	0.030817	0.084154
684	-0.057551	-0.034409	-0.018674	0.019484	0.069059	0.084806	-0.074838	-0.048145	-0.031721	0.0003958	0.044682	0.082978
696	-0.044422	-0.030684	-0.008518	0.03557	0.071023	0.081905	-0.073549	-0.041362	-0.023084	0.012381	0.05892	0.0803
708	-0.034506	-0.026816	0.0043156	0.051785	0.080512	0.085502	-0.071049	-0.036888	-0.012825	0.025734	0.074586	0.084224
720	-0.025962	-0.022874	0.015696	0.070392	0.090092	0.090454	-0.066868	-0.03344	-0.0047931	0.041361	0.089947	0.088715
732	-0.021296	-0.017907	0.025802	0.086132	0.10027	0.09516	-0.062252	-0.030024	0.0017469	0.058274	0.10077	0.095249
744	-0.018178	-0.011582	0.032093	0.094315	0.10827	0.097931	-0.056057	-0.025301	0.0074924	0.070041	0.10708	0.10007
756	-0.015805	-0.0047709	0.03424	0.10163	0.11766	0.09379	-0.048301	-0.019767	0.012319	0.081514	0.11173	0.1034
768	-0.012141	0.0034115	0.036958	0.10687	0.12118	0.082236	-0.040438	-0.012949	0.018248	0.091209	0.11289	0.10192
780	-0.0042546	0.013617	0.03935	0.10636	0.12232	0.067733	-0.029852	-0.0021317	0.024903	0.097277	0.10964	0.098607
792	0.0081678	0.022502	0.044602	0.105	0.1185	0.049931	-0.018583	0.010044	0.034003	0.1007	0.10688	0.092192
804	0.021761	0.030748	0.051728	0.10523	0.11319	0.036276	-0.0055079	0.021334	0.044494	0.10384	0.10535	0.084221
816	0.035957	0.037043	0.062906	0.09762	0.096403	0.022336	0.0077482	0.033518	0.054583	0.10269	0.099188	0.070294
828	0.049299	0.041995	0.071057	0.091149	0.077539	0.0047564	0.022695	0.04395	0.05976	0.10218	0.094173	0.050705
840	0.055695	0.044386	0.080244	0.083951	0.053065	-0.009821	0.033135	0.050339	0.065615	0.10029	0.088355	0.028785
852	0.057302	0.049007	0.085916	0.075583	0.03278	-0.024055	0.041356	0.057718	0.069512	0.097268	0.08014	0.0054266
864	0.055574	0.054356	0.092097	0.0653	0.0091367	-0.042179	0.045946	0.065394	0.070542	0.094646	0.064814	-0.018126
876	0.051701	0.060718	0.095376	0.061197	-0.0078164	-0.058642	0.049811	0.06958	0.071608	0.092267	0.050755	-0.036528
888	0.047933	0.063275	0.096986	0.051211	-0.023579	-0.06891	0.05032	0.07321	0.0736	0.08488	0.032068	-0.04911
900	0.045928	0.061146	0.094031	0.03897	-0.035668	-0.077826	0.052933	0.072103	0.072269	0.07513	0.012476	-0.060461
912	0.044436	0.053663	0.09088	0.024205	-0.049311	-0.080782	0.056365	0.064361	0.070487	0.061388	-0.0067996	-0.068195
924	0.042554	0.043473	0.082949	0.010407	-0.058532	-0.079344	0.059349	0.054221	0.068549	0.044831	-0.020742	-0.072366
936	0.040143	0.032103	0.070155	-0.0075789	-0.066789	-0.07514	0.05751	0.045997	0.061219	0.026275	-0.033179	-0.075153
948	0.033306	0.023723	0.055232	-0.024987	-0.072757	-0.066616	0.053514	0.037537	0.053161	0.008145	-0.043573	-0.074976
960	0.027265	0.019345	0.039977	-0.040729	-0.071847	-0.058907	0.046079	0.034131	0.045053	-0.0090065	-0.050204	-0.070214
972	0.022234	0.016771	0.021355	-0.051085	-0.067251	-0.052927	0.035007	0.035629	0.033626	-0.02107	-0.054697	-0.064136
984	0.019059	0.013841	0.0033115	-0.061219	-0.05963	-0.044253	0.024049	0.037105	0.019878	-0.03238	-0.056201	-0.056698
996	0.01723	0.011073	-0.011741	-0.067603	-0.049556	-0.034281	0.016048	0.036114	0.0094288	-0.040462	-0.055817	-0.047476
1008	0.017435	0.0070506	-0.023524	-0.066982	-0.038731	-0.028511	0.0095735	0.032452	-0.00096071	-0.044745	-0.051828	-0.039209
1020	0.018273	0.0029205	-0.03185	-0.061526	-0.032549	-0.024105	0.0067993	0.027023	-0.010785	-0.047005	-0.047388	-0.032141
1032	0.017797	-0.00044098	-0.035876	-0.057752	-0.02895	-0.020901	0.0070549	0.018377	-0.017039	-0.049683	-0.043792	-0.026203
1044	0.016247	-0.0036231	-0.038964	-0.051253	-0.027923	-0.022483	0.0086675	0.009065	-0.020637	-0.048857	-0.04247	-0.023278
1056	0.013134	-0.0074619	-0.040279	-0.042751	-0.029881	-0.027355	0.010089	0.0007784	-0.02384	-0.045953	-0.04103	-0.024118
1068	0.011749	-0.010898	-0.041454	-0.037225	-0.03314	-0.032548	0.013146	-0.0049931	-0.024556	-0.044542	-0.039966	-0.026926
1080	0.0075451	-0.017618	-0.041227	-0.035571	-0.036589	-0.035069	0.015505	-0.010837	-0.026017	-0.040254	-0.041235	-0.031532
1092	0.004172	-0.026975	-0.041458	-0.033915	-0.038349	-0.035155	0.017704	-0.014431	-0.03029	-0.035133	-0.041595	-0.03611
1104	0.0013752	-0.034694	-0.042091	-0.036987	-0.038444	-0.030411	0.019955	-0.016953	-0.035563	-0.034246	-0.04213	-0.037497
1116	0.00041694	-0.040602	-0.044182	-0.044193	-0.034551	-0.022925	0.026244	-0.018402	-0.042867	-0.038227	-0.043979	-0.033467
1128	-0.001528	-0.045184	-0.048791	-0.050841	-0.027955	-0.012781	0.032808	-0.017961	-0.054492	-0.043765	-0.046357	-0.02618
1140	-0.0010834	-0.043484	-0.056109	-0.052557	-0.018049	-0.0036013	0.037163	-0.015007	-0.063639	-0.052855	-0.043911	-0.015824
1152	-0.0029391	-0.037952	-0.06097	-0.05011	-0.0086231	0.0015507	0.040459	-0.01445	-0.068327	-0.060571	-0.038588	-0.005779
1164	-0.0062815	-0.031931	-0.060543	-0.039016	-0.00055405	0.00042587	0.040128	-0.011859	-0.069541	-0.060717	-0.029969	0.0026222
1176	-0.013016	-0.029746	-0.049756	-0.021652	0.0033004	-0.0083805	0.034122	-0.016457	-0.063192	-0.049417	-0.02012	0.0045969
1188	-0.020903	-0.025712	-0.035956	-0.00070588	0.0059535	-0.020456	0.026175	-0.021721	-0.0527	-0.035229	-0.0072287	0.0052232
1200	-0.032981	-0.035438	0	0.023055	0.0015104	-0.045413	0.014391	-0.042375	-0.03257	0	0	-0.003624
