# Supplementary material for: Retrograde ERK activation waves drive base-to-apex multicellular flow in murine cochlear duct morphogenesis
Source: eLife. 2021 Mar 5;10:e61092. doi: 10.7554/eLife.61092 (PMC7935486; doi:10.7554/eLife.61092)
Supplement: Figure 3—source data 2. [file elife-61092-fig3-data2.xlsx]

## Sheet: PD0325901
PIV speed [µm/min]
Before	After
0.162333	0.080279
0.162333	0.0890273
0.173867	0.1665
0.233528	0.238268
0.264387	0.251298
0.299815	0.146296
0.332009	0.130325
0.332009	0.139861
0.239958	0.168557
0.214805	0.19374
0.239958	0.216066
0.184439	0.237512
0.169892	0.253718
0.190663	0.179831
0.197983	0.105862
0.197983	0.105862
0.210431	0.216237
0.220063	0.220072
0.283113	0.224982
0.186033	0.135841
0.184354	0.13544
0.184354	0.13544
0.198225	0.193705
0.244003	0.219462
0.284155	0.170449
0.318275	0.162231
0.318275	0.162231
0.266451	0.217791
0.195311	0.231197
0.266451	0.247964
0.22577	0.258959
0.220324	0.297528
0.193476	0.297528
0.193476	0.200338
0.216328	0.193898
0.22276	0.252304
0.23984	0.262553
0.29234	0.262553
0.165857	0.184176
0.157994	0.184176
0.164349	0.135297
0.187132	0.135297
0.247992	0.157768
0.277181	0.186496
0.269423	0.157768
0.248486	0.162877
0.217058	0.207157
0.224172	0.220392
0.28879	0.224576
0.288361	0.225897
0.24904	0.249853
0.216124	0.249853
0.224666	0.242619
0.237376	0.126012
0.243434	0.205409
0.271247	0.205409
0.27455	0.196856
0.292481	0.170457
0.251533	0.174149
0.21261	0.165044
0.226576	0.165044
0.325825	0.202567
0.343299	0.202567
0.375705	0.18058
0.4177	0.14078
0.346573	0.14078
0.237976	0.14507
0.29426	0.166669
0.278536	0.16587
0.278536	0.164986
0.29435	0.160691
0.315022	0.132032
0.325714	0.109613
0.305503	0.094079
0.309952	0.110006
0.309952	0.0927931
0.228721	0.130259
0.20221	0.141293
0.185344	0.12231
0.20221	0.12231
0.213773	0.141546
0.277026	0.191233
0.290963	0.205227
0.327665	0.178324
0.293018	0.06756
0.197128	0.06756
0.26461	0.0930854
0.268304	0.102004
0.262473	0.127341
0.258194	0.166721
0.25734	0.166721
0.262447	0.125918
0.262857	0.0795222
0.291565	0.0934252
0.298145	0.0752628
0.207768	0.115567
0.208376	0.143715
0.208376	0.143715
0.224919	0.13828
0.244409	0.13828
0.293399	0.194082
0.311802	0.254784
0.335759	0.195312
0.311802	0.108796
0.233804	0.108796
0.319921	0.134238
0.319921	0.165828
0.362227	0.160914
0.275617	0.215425
0.267728	0.215425
0.281334	0.130754
0.282329	0.122097
0.284283	0.103548
0.282329	0.103548
0.245374	0.180653
0.248744	0.20492
0.245374	0.213016
0.246105	0.20492
0.263693	0.162205
0.295931	0.162205
0.295931	0.233679
0.302645	0.233679
0.302645	0.156396
0.264887	0.107647
0.263668	0.102506
0.263668	0.123291
0.329389	0.147674
0.329389	0.227785
0.310203	0.196732
0.32713	0.16381
0.306665	0.127375
0.306665	0.0714959
0.299004	0.062038
0.224687	0.115422
0.253446	0.123259
0.311337	0.123481
0.207812	0.124003
0.226615	0.145918
0.26047	0.157093
0.255115	0.211147
0.294226	0.235974
0.319	0.209143
0.319	0.113235
0.295029	0.103863
0.288639	0.113235
0.339799	0.147206
0.291476	0.147949
0.264786	0.182816
0.316701	0.147591
0.316701	0.131141
0.323727	0.131141
0.338186	0.131141
0.253063	0.128762
0.256066	0.134207
0.277104	0.211078
0.256066	0.256812
0.274951	0.256812
0.299343	0.155992
0.335799	0.167439
0.354518	0.155992
0.367219	0.121623
0.364419	0.121135
0.319051	0.13638
0.281445	0.197325
0.311574	0.226454
0.309816	0.24423
0.271949	0.260673
0.273395	0.267603
0.315001	0.23033
0.328747	0.120563
0.328747	0.0990448
0.209791	0.138366
0.228909	0.147014
0.271178	0.180097
0.271948	0.242256
0.278131	0.242256
0.303928	0.221127
0.300145	0.221127
0.33068	0.250728
0.344533	0.250728
0.347904	0.182895
0.326817	0.186775
0.288197	0.201865
0.310644	0.227572
0.306307	0.22066
0.306307	0.221316
0.322798	0.221316
0.341211	0.225609
0.340953	0.141989
0.327377	0.0911412
0.284598	0.182606
0.310727	0.153808
0.350681	0.175921
0.356502	0.24922
0.335919	0.24922
0.335919	0.228719
0.30645	0.227274
0.312221	0.216733
0.315228	0.216733
0.317592	0.138935
0.288291	0.137393
0.258081	0.153862
0.331331	0.208468
0.361439	0.208468
0.31706	0.208468
0.299189	0.206079
0.322564	0.179311
0.33647	0.11015
0.333131	0.0958974
0.291561	0.219675
0.291561	0.180303
0.339848	0.219675
0.351804	0.271996
0.355595	0.29431
0.344582	0.288443
0.340078	0.251579
0.331533	0.243925
0.325791	0.241547
0.294455	0.165054
0.257802	0.158326
0.25682	0.158326
0.282398	0.15756
0.31851	0.147503
0.32466	0.152813
0.274622	0.142178
0.275204	0.142178
0.273646	0.101241
0.275782	0.0885819
0.299123	0.157132
0.286572	0.116182
0.292314	0.116182
0.306179	0.148428
0.306179	0.219306
0.314243	0.219306
0.302951	0.203671
0.29305	0.203671
0.288487	0.203671
0.260283	0.146527
0.25313	0.146527
0.249384	0.155173
0.286819	0.125809
0.286819	0.11289
0.30374	0.11289
0.269185	0.100478
0.31569	0.1045
0.301885	0.134192
0.284595	0.132942
0.283105	0.17849
0.278071	0.15617
0.303621	0.126493
0.326385	0.139265
0.303621	0.165589
0.297009	0.227347
0.297009	0.21889
0.297009	0.200399
0.296759	0.179332
0.282872	0.187808
0.273146	0.157997
0.266476	0.187808
0.218661	0.192748
0.190807	0.186922
0.218661	0.186922
0.270667	0.130407
0.270667	0.130407
0.288807	0.100145
0.234916	0.106879
0.291162	0.175353
0.257815	0.0958049
0.238271	0.0787071
0.272927	0.0918617
0.272927	0.174855
0.273003	0.220295
0.289824	0.200019
0.310059	0.189042
0.310189	0.118111
0.317548	0.119843
0.268004	0.10002
0.268004	0.131913
0.238786	0.170694
0.209037	0.138938
0.219952	0.130381
0.270952	0.11417
0.254018	0.125071
0.254018	0.0786046
0.2249	0.122904

## Sheet: SU5402
PIV speed [µm/min]
Before	After
0.257516	0.166998
0.257516	0.181403
0.265154	0.192622
0.266614	0.20132
0.3209	0.196861
0.368911	0.197779
0.357146	0.196861
0.347384	0.192392
0.313153	0.198432
0.32608	0.198432
0.329412	0.198432
0.329412	0.177022
0.319936	0.165124
0.319936	0.141141
0.252168	0.17829
0.278748	0.178155
0.317648	0.187719
0.269071	0.195507
0.394804	0.20019
0.394804	0.195513
0.342062	0.193331
0.319229	0.190974
0.306562	0.174554
0.316833	0.172473
0.321821	0.16467
0.268813	0.151137
0.334738	0.135171
0.351577	0.125336
0.229642	0.157401
0.282895	0.147347
0.343	0.141462
0.329272	0.124628
0.373049	0.116688
0.375425	0.118557
0.328547	0.129642
0.301211	0.13776
0.301211	0.166581
0.300349	0.177344
0.303935	0.153986
0.267058	0.148424
0.267058	0.112405
0.282559	0.0937648
0.308826	0.171373
0.301233	0.162965
0.345243	0.162965
0.345243	0.157955
0.404022	0.155314
0.404022	0.153033
0.324649	0.155314
0.336127	0.160929
0.343985	0.176164
0.339782	0.180629
0.339782	0.165559
0.316939	0.173135
0.331156	0.163652
0.353488	0.126176
0.308894	0.137137
0.342125	0.133603
0.373337	0.131815
0.358923	0.133034
0.358271	0.147824
0.338973	0.149666
0.331832	0.163639
0.346027	0.170023
0.364898	0.170023
0.375693	0.175108
0.375555	0.153276
0.313749	0.163501
0.327564	0.142572
0.41552	0.130596
0.324346	0.194905
0.328041	0.179146
0.344318	0.183181
0.344318	0.158153
0.338841	0.16997
0.311071	0.170654
0.28828	0.170654
0.32939	0.194697
0.35765	0.211077
0.35765	0.237265
0.350228	0.213078
0.295462	0.208045
0.328774	0.171513
0.351073	0.140381
0.307927	0.182521
0.339379	0.157458
0.339379	0.158243
0.363091	0.154006
0.360596	0.154006
0.337027	0.160202
0.330799	0.16786
0.33193	0.184807
0.335077	0.1996
0.344594	0.201127
0.334128	0.171575
0.238548	0.167299
0.26315	0.135451
0.372938	0.115293
0.320898	0.17362
0.344794	0.154153
0.344794	0.155687
0.326809	0.152959
0.326238	0.155687
0.346265	0.170967
0.346124	0.181645
0.350591	0.202916
0.350756	0.196982
0.355583	0.196982
0.357803	0.18577
0.207126	0.18577
0.207126	0.148269
0.212762	0.123328
0.363969	0.191347
0.405828	0.14567
0.405828	0.134426
0.407658	0.135422
0.42129	0.140027
0.456922	0.166725
0.456922	0.181019
0.478337	0.192205
0.478337	0.18981
0.468233	0.185661
0.452763	0.148527
0.432108	0.141496
0.403227	0.116617
0.351704	0.116617
0.180106	0.169756
0.209045	0.14265
0.223249	0.14265
0.254464	0.145843
0.274657	0.157098
0.278952	0.169274
0.291388	0.169274
0.289487	0.170268
0.291463	0.167492
0.257279	0.161764
0.242412	0.128049
0.218271	0.128049
0.209574	0.112165
0.209574	0.109506
0.165675	0.180082
0.183781	0.149706
0.180225	0.128515
0.173465	0.125743
0.180225	0.128515
0.207272	0.161162
0.202841	0.166444
0.208248	0.183761
0.222148	0.183761
0.226179	0.18383
0.240217	0.146555
0.234002	0.132034
0.248094	0.0926589
0.224546	0.087755
0.164186	0.163166
0.170492	0.137532
0.181544	0.138258
0.17626	0.140937
0.168475	0.148183
0.160537	0.160967
0.158528	0.172415
0.171491	0.180453
0.181439	0.181703
0.185463	0.168041
0.237942	0.103305
0.266318	0.094907
0.237942	0.0839396
0.229673	0.0851351
0.195484	0.116013
0.18809	0.10495
0.18809	0.0999233
0.185012	0.11517
0.17224	0.122374
0.177254	0.126489
0.18145	0.145324
0.188895	0.155621
0.212557	0.147313
0.264765	0.13003
0.292175	0.0830808
0.315603	0.113429
0.261911	0.114792
0.235586	0.118785
0.212004	0.11253
0.207125	0.0927752
0.190077	0.0978893
0.188613	0.102972
0.188951	0.128273
0.195266	0.159432
0.195173	0.175373
0.188492	0.183244
0.204646	0.182732
0.255285	0.152882
0.255285	0.086056
0.247078	0.0733945
0.205163	0.0706003
0.165618	0.0713908
0.201742	0.109259
0.188415	0.100964
0.182578	0.0957419
0.171248	0.0961454
0.173753	0.126267
0.173887	0.167183
0.17961	0.203885
0.18162	0.222876
0.205725	0.205884
0.233237	0.167191
0.226287	0.103465
0.212126	0.0610066
0.167665	0.0598327
0.145084	0.0657176

## Sheet: Cyclopamine
PIV speed [µm/min]
Before(-3hrs)	After(+3hrs)	After(+8hrs)
0.205308	0.137147	0.112364
0.235104	0.143165	0.112364
0.205308	0.137147	0.0804018
0.211305	0.143165	0.0834699
0.210766	0.185155	0.0769337
0.147468	0.148623	0.0797525
0.242358	0.210524	0.0770584
0.202841	0.192821	0.0726055
0.133852	0.189041	0.0652566
0.242358	0.157966	0.0605004
0.220036	0.193065	0.0480006
0.166662	0.192821	0.0480006
0.117664	0.189041	0.0493642
0.28444	0.153907	0.0676146
0.26575	0.155011	0.0605004
0.214502	0.158742	0.042164
0.157762	0.166201	0.0449014
0.227118	0.264188	0.15595
0.227725	0.26154	0.136739
0.227118	0.250414	0.0928994
0.227725	0.250414	0.0787762
0.22771	0.247361	0.0746736
0.22771	0.235592	0.0521263
0.224415	0.212945	0.072473
0.224415	0.189168	0.06408
0.224315	0.151183	0.0521263
0.224116	0.213061	0.0777603
0.223854	0.189041	0.0637297
0.223396	0.148479	0.0563268
0.221762	0.103627	0.0515262
0.23311	0.138276	0.0841931
0.228499	0.14187	0.0777603
0.225088	0.14187	0.0619714
0.223396	0.135009	0.0541648
0.24789	0.228513	0.190856
0.248776	0.220499	0.190856
0.248191	0.225138	0.164589
0.248191	0.217074	0.182516
0.245434	0.218733	0.160971
0.240261	0.212532	0.160971
0.248761	0.22327	0.115518
0.245906	0.218733	0.114128
0.242384	0.202906	0.12566
0.213426	0.228514	0.155329
0.237978	0.218553	0.115518
0.251766	0.213452	0.0927511
0.251766	0.190567	0.080073
0.195838	0.132693	0.136906
0.195838	0.161242	0.155329
0.211991	0.172677	0.115518
0.213426	0.172677	0.0903659
0.275851	0.243053	0.123301
0.270513	0.244661	0.141882
0.275851	0.243053	0.117905
0.2526	0.244661	0.141882
0.246483	0.231896	0.113978
0.24627	0.247129	0.113971
0.248593	0.222137	0.112151
0.24627	0.214348	0.105561
0.236212	0.214348	0.100582
0.235032	0.225177	0.140677
0.242818	0.222137	0.11957
0.242818	0.208698	0.107355
0.242818	0.193836	0.100582
0.231122	0.21991	0.0937425
0.242382	0.21991	0.120398
0.244041	0.211433	0.11957
0.244041	0.201926	0.105561
0.247643	0.151582	0.21124
0.24526	0.16288	0.213596
0.24526	0.101328	0.172912
0.237773	0.136558	0.177493
0.232074	0.151007	0.172912
0.233955	0.116732	0.134168
0.19784	0.176359	0.129434
0.215293	0.168803	0.129434
0.227953	0.151007	0.129434
0.172916	0.160269	0.100767
0.172916	0.147461	0.105775
0.179481	0.159545	0.105775
0.180767	0.168803	0.0958108
0.176702	0.197257	0.0729271
0.164846	0.137612	0.0819713
0.149984	0.0897263	0.0832957
0.131408	0.115203	0.0998554
0.273154	0.165663	0.152875
0.272268	0.207642	0.159388
0.263937	0.165663	0.133872
0.252481	0.225451	0.133872
0.252481	0.22978	0.125599
0.236964	0.233665	0.112349
0.246879	0.219672	0.0810581
0.246879	0.219672	0.104602
0.236964	0.222548	0.104602
0.230525	0.178104	0.0552294
0.232231	0.190905	0.0511045
0.241807	0.190905	0.0631835
0.236964	0.186601	0.0810581
0.229945	0.072572	0.0712191
0.217347	0.129508	0.0684648
0.2121	0.152446	0.0552294
0.211818	0.152446	0.0485478
0.267971	0.191315	0.0811606
0.279201	0.20416	0.0750371
0.26497	0.19434	0.057462
0.26497	0.203266	0.0649659
0.248369	0.194099	0.0639823
0.235945	0.197654	0.0416097
0.249268	0.200108	0.0639823
0.228499	0.193145	0.0591708
0.223529	0.1916	0.0336428
0.236142	0.222854	0.0643503
0.246998	0.219217	0.0632103
0.228242	0.198609	0.045616
0.206019	0.187797	0.0336428
0.236142	0.237295	0.0479233
0.233125	0.231285	0.05139
0.232646	0.221214	0.05139
0.228242	0.204311	0.0432048
0.369567	0.262159	0.151981
0.378961	0.278045	0.119051
0.366694	0.269047	0.117599
0.374048	0.273132	0.113421
0.341393	0.264133	0.102707
0.332153	0.258276	0.0753783
0.338056	0.279154	0.0579056
0.322764	0.264133	0.0579056
0.313645	0.252103	0.0579056
0.313803	0.283651	0.0625149
0.32562	0.279154	0.049694
0.306406	0.253651	0.0389389
0.2935	0.24972	0.0279949
0.308503	0.304677	0.0457979
0.308503	0.288339	0.0528194
0.308503	0.280609	0.0528194
0.303542	0.221558	0.049694
0.34088	0.195784	0.0887227
0.332274	0.196232	0.0887227
0.319012	0.194636	0.0827953
0.331389	0.195784	0.0800916
0.329136	0.199863	0.0587804
0.327297	0.194595	0.0587804
0.310868	0.216194	0.024951
0.32525	0.212331	0.024951
0.32525	0.199779	0.0383898
0.273071	0.208718	0.0237126
0.274656	0.21291	0.024951
0.285833	0.212631	0.024951
0.285833	0.20431	0.0235757
0.265309	0.189038	0.0215353
0.257384	0.189038	0.0193912
0.23352	0.190107	0.0193912
0.217141	0.192272	0.0237126
0.27012	0.177882	0.172637
0.284407	0.194715	0.180904
0.225817	0.177882	0.169795
0.207882	0.194715	0.187152
0.092133	0.172868	0.168818
0.0673037	0.173062	0.187152
0.118656	0.171561	0.117053
0.0740332	0.171902	0.117053
0.0534648	0.171902	0.137621
0.133626	0.142019	0.102137
0.10972	0.142019	0.0720684
0.0740332	0.16832	0.050211
0.0677171	0.171561	0.050211
0.190542	0.151669	0.113545
0.133626	0.130403	0.0820053
0.096253	0.10589	0.0602369
0.0736236	0.0897732	0.0401246
0.314637	0.212838	0.153136
0.332421	0.220352	0.149256
0.314527	0.206152	0.149256
0.3323	0.221037	0.138334
0.335738	0.233199	0.127425
0.317128	0.221037	0.131337
0.340054	0.240724	0.117572
0.337756	0.233199	0.125707
0.319088	0.221037	0.127425
0.26329	0.221639	0.0884296
0.305432	0.221034	0.0884296
0.321476	0.217474	0.0907187
0.317128	0.197684	0.114312
0.210716	0.197854	0.0686716
0.210716	0.197312	0.0681626
0.210847	0.17425	0.0681626
0.221156	0.164512	0.072473
0.288242	0.201189	0.151512
0.308173	0.20878	0.148107
0.307219	0.201189	0.147071
0.298652	0.21262	0.13776
0.253327	0.227586	0.1251
0.253327	0.21262	0.122552
0.194372	0.209351	0.115601
0.231309	0.214514	0.115107
0.242954	0.213239	0.113277
0.156472	0.183291	0.101691
0.141126	0.183291	0.104074
0.180809	0.204141	0.10747
0.194372	0.212742	0.10747
0.188128	0.178596	0.0814696
0.139467	0.172859	0.0908349
0.110032	0.171518	0.100909
0.110032	0.171518	0.101691
0.205643	0.190309	0.114592
0.206331	0.20077	0.095796
0.201848	0.195821	0.0994768
0.201848	0.2123	0.0994768
0.170356	0.23215	0.100016
0.170356	0.2123	0.100016
0.128319	0.221218	0.103446
0.151834	0.228641	0.100016
0.163427	0.217129	0.100016
0.0714809	0.199467	0.0876141
0.0688446	0.189011	0.0937164
0.101047	0.199659	0.0937164
0.128319	0.189011	0.092141
0.104292	0.185862	0.060528
0.0741531	0.177784	0.0769042
0.0627789	0.171853	0.0876141
0.0584189	0.168846	0.0876141
0.315911	0.206183	0.120644
0.32169	0.20771	0.130758
0.32169	0.20771	0.120644
0.316052	0.20771	0.130758
0.316052	0.205302	0.101545
0.303932	0.206197	0.110025
0.316993	0.200465	0.0719612
0.283128	0.201304	0.0656649
0.240651	0.202071	0.0578625
0.290034	0.196319	0.0921137
0.304798	0.188919	0.08165
0.272675	0.188919	0.0700263
0.240651	0.187821	0.0607054
0.254866	0.199123	0.0925123
0.254866	0.166749	0.106489
0.271156	0.141728	0.0953055
0.271156	0.141728	0.0921137
0.275504	0.216804	0.119377
0.293113	0.213072	0.119377
0.282933	0.211925	0.100099
0.292064	0.21157	0.100099
0.291776	0.213072	0.0647319
0.291864	0.198627	0.0576944
0.277516	0.203388	0.0648104
0.281644	0.178434	0.0573164
0.284372	0.171268	0.0482153
0.271545	0.203388	0.0862273
0.27694	0.200816	0.076075
0.277125	0.171268	0.0676073
0.278934	0.163862	0.0538732
0.201007	0.141535	0.107098
0.204769	0.151073	0.107907
0.204769	0.159287	0.0967543
0.205113	0.159287	0.0862273
