# Supplementary material for: Retrograde ERK activation waves drive base-to-apex multicellular flow in murine cochlear duct morphogenesis
Source: eLife. 2021 Mar 5;10:e61092. doi: 10.7554/eLife.61092 (PMC7935486; doi:10.7554/eLife.61092)
Supplement: Figure 4—source data 1. [file elife-61092-fig4-data1.xlsx]

## Sheet: Sheet1
PIV speed [µm/min]
Before	After
0.28504	0.179711
0.290535	0.167643
0.293653	0.161874
0.300117	0.159968
0.300597	0.156589
0.298636	0.157365
0.289293	0.160741
0.279186	0.184024
0.299444	0.174184
0.299444	0.167643
0.298636	0.158035
0.252677	0.18142
0.323048	0.167945
0.23137	0.19369
0.327603	0.167926
0.331908	0.168937
0.195651	0.193222
0.156191	0.196681
0.328064	0.177457
0.314797	0.174795
0.296027	0.167732
0.296027	0.167225
0.302282	0.155874
0.292113	0.152289
0.26632	0.149923
0.254003	0.157744
0.192455	0.170042
0.285847	0.167732
0.302282	0.176144
0.281222	0.157744
0.295215	0.0868886
0.373785	0.14078
0.233665	0.104628
0.371223	0.125508
0.369171	0.120102
0.292953	0.119791
0.265652	0.121941
0.372677	0.114027
0.369929	0.113667
0.369764	0.113667
0.363491	0.123154
0.356727	0.128448
0.335403	0.128342
0.31169	0.128342
0.302447	0.119791
0.299306	0.119791
0.352349	0.123154
0.335403	0.128273
0.311936	0.128273
0.293985	0.0530453
0.268393	0.108177
0.295485	0.0717722
0.271893	0.0828068
0.27562	0.0839603
0.283096	0.0647433
0.278621	0.0746982
0.263899	0.0942656
0.256389	0.0978325
0.253968	0.0942656
0.254144	0.0963853
0.254241	0.0902995
0.25452	0.0908346
0.25824	0.0821858
0.258293	0.0671442
0.258293	0.0671442
0.253968	0.0967402
0.253968	0.0956355
0.254241	0.0902179
0.259439	0.0813471
0.286606	0.0958631
0.262048	0.106662
0.290451	0.0936946
0.290786	0.100772
0.26003	0.0943236
0.262006	0.115953
0.28392	0.101155
0.281179	0.100997
0.275043	0.101155
0.26365	0.108234
0.244782	0.108353
0.231172	0.107721
0.231268	0.10645
0.234224	0.0953429
0.245773	0.0943236
0.250747	0.101643
0.229062	0.107232
0.229062	0.107232
0.343429	0.0767941
0.346046	0.0669496
0.341046	0.0731423
0.331005	0.0489751
0.332725	0.0489751
0.341639	0.07926
0.338795	0.0773766
0.335313	0.060795
0.320765	0.0649453
0.31411	0.070033
0.303823	0.0757109
0.294534	0.0774319
0.294534	0.0827954
0.305992	0.0880603
0.325874	0.0880603
0.338795	0.0832506
0.302461	0.0709038
0.300973	0.0743038
0.29909	0.0830725
0.350798	0.0417967
0.336899	0.0689592
0.347547	0.0437766
0.304212	0.0689592
0.308198	0.0689592
0.358218	0.0289806
0.342543	0.0373295
0.302069	0.0368317
0.297416	0.0334957
0.29098	0.0364182
0.29098	0.0364182
0.295128	0.024846
0.303686	0.0208206
0.323652	0.0208206
0.32518	0.0208206
0.323652	0.0237898
0.290544	0.024846
0.288011	0.0120641
0.252779	0.0115288
0.300295	0.0171413
0.242924	0.0496385
0.288154	0.0189428
0.221487	0.0241283
0.219736	0.0318429
0.291652	0.0410259
0.289148	0.0410259
0.194179	0.0235269
0.182752	0.0283553
0.182752	0.0283553
0.200955	0.0283553
0.205229	0.0378701
0.246116	0.039127
0.261603	0.0484517
0.272687	0.0341815
0.280274	0.0410259
0.185029	0.0265582
0.199795	0.0256647
0.199795	0.0341815
0.31662	0.0132697
0.314546	0.0368
0.320883	0.0214137
0.306154	0.0393486
0.318324	0.0393486
0.332299	0.0225268
0.333289	0.0349251
0.302769	0.0166866
0.285697	0.022645
0.274053	0.0333155
0.274053	0.0396116
0.281775	0.0465438
0.282901	0.0465438
0.292903	0.0441152
0.308364	0.025051
0.320944	0.025051
0.242711	0.0240735
0.250371	0.0347679
0.259395	0.0347679
0.270133	0.0452671
0.174519	0.0717396
0.270162	0.0396836
0.152616	0.084669
0.173873	0.084669
0.291549	0.0538308
0.282227	0.0494034
0.169221	0.0541491
0.168978	0.0484423
0.168978	0.0484423
0.190087	0.0431026
0.205195	0.0353805
0.22288	0.0263059
0.244085	0.0258142
0.273884	0.0432163
0.300525	0.0519368
0.126904	0.0456616
0.133374	0.0300149
0.153845	0.0263059
0.276849	0.0422385
0.257094	0.0460304
0.280143	0.0522924
0.231643	0.0439908
0.225934	0.037095
0.271804	0.0505795
0.275211	0.0554639
0.221338	0.0461868
0.224484	0.0510043
0.225532	0.0510043
0.212424	0.0532267
0.212424	0.0606623
0.21449	0.0646459
0.21449	0.0646459
0.200265	0.0555155
0.200265	0.052104
0.171846	0.0387341
0.149764	0.0486206
0.1271	0.0629368
0.235316	0.0439539
0.267212	0.0390487
0.238532	0.0448609
0.242869	0.0315171
0.225177	0.0366962
0.2586	0.0453072
0.241709	0.0494002
0.223183	0.048209
0.228335	0.048209
0.237283	0.048209
0.241839	0.0448799
0.250233	0.0491864
0.266905	0.0518605
0.272728	0.0518605
0.266905	0.044372
0.2586	0.044372
0.222197	0.0268402
0.232882	0.0441123
0.240622	0.0509413
0.257447	0.0413319
0.213218	0.0675268
0.259045	0.0499278
0.213218	0.0675268
0.215969	0.0770078
0.263966	0.0596965
0.251522	0.0539436
0.192118	0.0621522
0.188708	0.0489949
0.188708	0.0426476
0.194102	0.03831
0.197537	0.0325033
0.216374	0.0210096
0.252944	0.0325033
0.258173	0.0523768
0.261615	0.0678817
0.1393	0.03831
0.1393	0.03831
0.159682	0.0210096
0.187045	0.0400089
0.259732	0.0524523
0.151668	0.0353872
0.249516	0.0633221
0.256142	0.0615194
0.260701	0.0226973
0.21106	0.0218313
0.227758	0.0622432
0.246157	0.0548447
0.246157	0.0485788
0.245088	0.0512513
0.245088	0.0614648
0.249602	0.06092
0.271969	0.0588875
0.288312	0.0422184
0.288312	0.0235211
0.201778	0.0614648
0.201778	0.0637659
0.205526	0.0614648
