# Supplementary material for: Retrograde ERK activation waves drive base-to-apex multicellular flow in murine cochlear duct morphogenesis
Source: eLife. 2021 Mar 5;10:e61092. doi: 10.7554/eLife.61092 (PMC7935486; doi:10.7554/eLife.61092)
Supplement: Figure 4—source data 2. [file elife-61092-fig4-data2.xlsx]

## Sheet: ERK
	ERK activity
Time [min]	Region1	Region2	Region3	Region4	Region5	Region6	Region7	Region8	Region9	Region10
0	1.20006	1.18908	1.16417	1.13118	1.07246	1.12174	1.10827	1.09475	1.0433	1.08244
12	1.18559	1.17339	1.15291	1.14348	1.10094	1.11589	1.09074	1.074	1.06795	1.07512
24	1.18628	1.18103	1.15299	1.1536	1.12352	1.11562	1.08803	1.07856	1.06643	1.06706
36	1.20422	1.19199	1.17131	1.16428	1.13215	1.11923	1.09241	1.08494	1.07059	1.06223
48	1.21444	1.19685	1.17545	1.16603	1.13678	1.12844	1.10677	1.09572	1.07114	1.05632
60	1.22055	1.20064	1.18426	1.17382	1.14808	1.13594	1.11219	1.10463	1.0821	1.06932
72	1.22877	1.20475	1.19533	1.18662	1.16509	1.1447	1.11797	1.10898	1.09034	1.07087
84	1.23713	1.21062	1.19954	1.18982	1.17102	1.14978	1.12577	1.11826	1.09412	1.07337
96	1.25349	1.22423	1.2111	1.19713	1.18115	1.15645	1.13588	1.12902	1.10376	1.07842
108	1.25499	1.23466	1.22286	1.20048	1.17741	1.15838	1.14566	1.13687	1.10846	1.0827
120	1.26313	1.23842	1.23095	1.20576	1.18523	1.17036	1.16051	1.14929	1.11991	1.09131
132	1.26239	1.24069	1.24258	1.21591	1.19424	1.1807	1.1701	1.15638	1.12611	1.09997
144	1.2593	1.24034	1.24218	1.2201	1.2046	1.18893	1.17712	1.16081	1.13223	1.10981
156	1.25556	1.24168	1.24666	1.23141	1.21801	1.20101	1.18355	1.16574	1.14	1.12126
168	1.25564	1.24604	1.25554	1.23876	1.22517	1.20722	1.18902	1.17141	1.15418	1.13766
180	1.24694	1.23994	1.25194	1.2404	1.23409	1.21945	1.19506	1.17542	1.15899	1.14078
192	1.23969	1.23633	1.24711	1.24398	1.23688	1.22768	1.20477	1.18191	1.16116	1.14435
204	1.22549	1.2272	1.23553	1.23708	1.23589	1.2307	1.20977	1.19017	1.16653	1.15541
216	1.21449	1.21769	1.22954	1.23257	1.23112	1.22768	1.21223	1.19457	1.17474	1.16543
228	1.19352	1.20304	1.22284	1.22976	1.2252	1.22898	1.21032	1.19193	1.17694	1.17592
240	1.18499	1.18779	1.20853	1.21923	1.2231	1.2302	1.20932	1.19802	1.18485	1.1863
252	1.16704	1.17185	1.19936	1.20777	1.21307	1.21939	1.1979	1.19401	1.18409	1.19416
264	1.15455	1.16276	1.18431	1.19007	1.19602	1.20365	1.18954	1.18892	1.18329	1.19669
276	1.14842	1.15315	1.16868	1.16951	1.17674	1.19252	1.17918	1.18449	1.18354	1.19748
288	1.13776	1.13772	1.15311	1.15353	1.16272	1.18034	1.17312	1.17995	1.18156	1.19458
300	1.12496	1.127	1.13511	1.1368	1.14706	1.16183	1.1562	1.16765	1.17042	1.18558
312	1.11538	1.11742	1.1252	1.12444	1.12734	1.13862	1.1423	1.15723	1.16446	1.18168
324	1.11526	1.11557	1.12402	1.11288	1.11305	1.12263	1.13159	1.14912	1.15799	1.17457
336	1.11265	1.11395	1.12034	1.10314	1.09778	1.10713	1.12087	1.13832	1.15213	1.16246
348	1.10927	1.11059	1.11602	1.09811	1.0919	1.10089	1.10861	1.12722	1.13928	1.14804
360	1.10468	1.10572	1.10545	1.08561	1.0838	1.08754	1.10117	1.11867	1.12457	1.13039
372	1.10449	1.10316	1.10177	1.08438	1.08117	1.07864	1.08952	1.10104	1.1092	1.11417
384	1.10359	1.10327	1.09667	1.08882	1.08266	1.07707	1.08608	1.08885	1.09977	1.10097
396	1.10296	1.10234	1.09601	1.08987	1.08406	1.08134	1.08607	1.08466	1.09076	1.09005
408	1.09743	1.10115	1.09587	1.09298	1.08731	1.07951	1.08575	1.07936	1.08331	1.08153
420	1.09567	1.10075	1.09424	1.08859	1.0822	1.07562	1.08227	1.07457	1.08092	1.07442
432	1.0944	1.09377	1.09454	1.09014	1.08249	1.07754	1.08159	1.07486	1.07993	1.07638
444	1.08925	1.09342	1.09551	1.08641	1.08252	1.08266	1.08345	1.07551	1.07968	1.07395
456	1.08138	1.08468	1.08777	1.08328	1.08383	1.08369	1.08227	1.06798	1.07813	1.0744
468	1.08003	1.0783	1.07956	1.07908	1.08091	1.08246	1.08133	1.06725	1.07337	1.07119
480	1.07622	1.07454	1.07663	1.07752	1.07948	1.08593	1.08475	1.0671	1.07098	1.07219
492	1.07586	1.07364	1.07756	1.08146	1.07777	1.09158	1.08516	1.06825	1.07635	1.07964
504	1.07202	1.07122	1.07423	1.07585	1.07381	1.09226	1.08879	1.07031	1.07805	1.08711
516	1.07525	1.06816	1.06685	1.06363	1.06609	1.08739	1.08979	1.07264	1.07589	1.09064
528	1.0723	1.06195	1.05926	1.0573	1.06018	1.08091	1.0862	1.07289	1.07878	1.09549
540	1.06552	1.0531	1.05309	1.05345	1.05969	1.07727	1.08333	1.07175	1.07818	1.09868
552	1.05844	1.04855	1.04844	1.0495	1.05787	1.07424	1.07837	1.06554	1.06897	1.10067
564	1.06047	1.04918	1.04397	1.04273	1.05227	1.07126	1.0759	1.06349	1.06797	1.09007
576	1.05769	1.0431	1.03194	1.03887	1.04575	1.06159	1.07073	1.05814	1.0606	1.08318
588	1.05729	1.04473	1.03059	1.03257	1.03754	1.05378	1.06401	1.05883	1.05773	1.08313
600	1.05231	1.04038	1.02581	1.02853	1.03301	1.04725	1.05663	1.05129	1.05297	1.08163
612	1.05275	1.04052	1.02266	1.0266	1.03026	1.03676	1.04686	1.04354	1.05052	1.08119
624	1.0509	1.03658	1.01651	1.01939	1.02556	1.02632	1.03764	1.03807	1.04616	1.07446
636	1.0526	1.0397	1.01869	1.02046	1.02517	1.01973	1.02973	1.03264	1.04477	1.06917
648	1.05017	1.04441	1.02718	1.02213	1.02416	1.01788	1.02279	1.02609	1.03977	1.06224
660	1.05333	1.04466	1.03209	1.02212	1.02378	1.0176	1.01688	1.01946	1.03394	1.05276
672	1.05968	1.05292	1.04178	1.02903	1.02383	1.01696	1.01018	1.01391	1.0308	1.04725
684	1.06937	1.06518	1.05109	1.03445	1.02341	1.01265	1.00177	1.01234	1.0318	1.04171
696	1.07191	1.07313	1.05654	1.03771	1.02412	1.01312	0.998513	1.0067	1.02545	1.04117
708	1.08305	1.08564	1.06883	1.04161	1.02628	1.01395	0.994974	1.00323	1.02225	1.03797
720	1.09487	1.09301	1.0743	1.048	1.03354	1.01669	0.996305	1.00219	1.0179	1.03244
732	1.11083	1.11132	1.08925	1.06056	1.04407	1.02357	1.0037	1.00418	1.01693	1.03034
744	1.12427	1.12224	1.09702	1.06776	1.05079	1.03022	1.00672	1.00417	1.01817	1.02414
756	1.13948	1.13591	1.10806	1.07805	1.06393	1.03538	1.01245	1.00539	1.01439	1.02251
768	1.1432	1.1439	1.11762	1.0907	1.07243	1.04041	1.01489	1.00797	1.01507	1.01845
780	1.14996	1.15135	1.12333	1.10066	1.08201	1.04742	1.02023	1.01206	1.0198	1.01921
792	1.15492	1.15746	1.12644	1.1103	1.09116	1.052	1.02916	1.02114	1.02257	1.02454
804	1.15882	1.16377	1.13452	1.11666	1.10224	1.06518	1.04505	1.03172	1.02699	1.02703
816	1.16223	1.16728	1.14639	1.13092	1.11611	1.0801	1.06134	1.04357	1.03499	1.03672
828	1.16672	1.17142	1.15814	1.14495	1.13191	1.09345	1.07983	1.05853	1.04241	1.04342
840	1.17208	1.1743	1.16203	1.15562	1.14506	1.11249	1.09814	1.07054	1.05559	1.0571
852	1.16634	1.17114	1.16789	1.17006	1.16594	1.13358	1.11386	1.08209	1.06507	1.06761
864	1.15829	1.17316	1.17041	1.17477	1.17259	1.14504	1.11877	1.09078	1.07758	1.0843
876	1.14852	1.16569	1.16747	1.1801	1.18242	1.15497	1.13328	1.10996	1.09379	1.10494
888	1.13971	1.16271	1.16431	1.17793	1.18448	1.16975	1.14906	1.12786	1.113	1.12594
900	1.13551	1.15795	1.16119	1.17277	1.18804	1.17944	1.16668	1.14363	1.12568	1.13748
912	1.13458	1.15195	1.15984	1.17318	1.18998	1.18141	1.1757	1.16486	1.14274	1.1494
924	1.13017	1.15109	1.16221	1.17689	1.19282	1.18973	1.18693	1.17789	1.16073	1.16897
936	1.12242	1.14779	1.1547	1.17598	1.19062	1.19102	1.19149	1.18582	1.17465	1.18554
948	1.11357	1.14011	1.14553	1.1675	1.18639	1.18865	1.19462	1.19364	1.18403	1.19703
960	1.11106	1.13325	1.1333	1.15428	1.17548	1.18545	1.1931	1.19541	1.19938	1.21523
972	1.10344	1.12523	1.12426	1.14741	1.16944	1.17543	1.18488	1.19449	1.2033	1.22117
984	1.09881	1.12195	1.11861	1.13607	1.15189	1.16334	1.18127	1.18994	1.20784	1.23104
996	1.09368	1.1088	1.11162	1.12942	1.14368	1.1559	1.17637	1.18832	1.20721	1.22986
1008	1.09031	1.10856	1.11539	1.12172	1.13312	1.14847	1.16741	1.1799	1.20123	1.22611
1020	1.0863	1.10425	1.11606	1.12184	1.13037	1.14014	1.15493	1.17092	1.19227	1.21437
1032	1.0839	1.09485	1.10926	1.11685	1.12435	1.13544	1.14362	1.16046	1.18624	1.21211
1044	1.07519	1.08919	1.0989	1.11117	1.11987	1.13568	1.13658	1.14495	1.1771	1.20492
1056	1.0703	1.08391	1.09093	1.10093	1.11124	1.12739	1.12504	1.13544	1.16694	1.19397
1068	1.07417	1.07654	1.08483	1.09364	1.10814	1.12344	1.11993	1.13006	1.15847	1.18229
1080	1.07685	1.07098	1.07356	1.08649	1.10177	1.11782	1.11362	1.11655	1.14577	1.16551
1092	1.06984	1.06908	1.07563	1.08394	1.10102	1.11159	1.10979	1.10948	1.13216	1.14683
1104	1.07091	1.06805	1.07782	1.07818	1.09684	1.1076	1.10876	1.10664	1.12718	1.1371
1116	1.06884	1.07062	1.07807	1.07537	1.09054	1.10321	1.09856	1.10296	1.12203	1.12308
1128	1.06917	1.06573	1.07019	1.06853	1.08596	1.09624	1.09664	1.09767	1.11625	1.1134
1140	1.06688	1.05958	1.06333	1.06464	1.08222	1.09442	1.09171	1.0887	1.10312	1.10161
1152	1.06787	1.05332	1.0597	1.06173	1.08108	1.0916	1.09013	1.08477	1.09935	1.09577
1164	1.07194	1.05597	1.06196	1.06002	1.07537	1.08577	1.08785	1.08141	1.09296	1.09113
1176	1.07341	1.05618	1.06072	1.05679	1.06856	1.07642	1.07958	1.06774	1.08207	1.07651
1188	1.0703	1.05005	1.05936	1.05913	1.06476	1.07216	1.06636	1.0643	1.07752	1.07807
1200	1.07114	1.02939	1.03923	1.05869	1.07185	1.06897	1.061	1.0565	1.05634	1.06583
1212	1.07896	1.02757	1.06029	1.0751	1.11313	1.08807	1.06572	1.0846	1.07487	1.05955

## Sheet: Curvature
	Curvature
Time [min]	Region1	Region2	Region3	Region4	Region5	Region6	Region7	Region8	Region9	Region10
0	-0.00339381	-0.00370986	-0.00302001	-0.00143897	0.000456021	0.00143897	0.00229471	0.00172644	0.00135204	-0.00106332
12	-0.00593594	-0.00561704	-0.00383562	0.000364267	0.00219613	0.00270084	0.00536219	0.00484776	0.00267309	-1.90306e-05
24	-0.00604703	-0.00573278	-0.00396311	-0.000496299	0.00137408	0.00266609	0.00505873	0.0048109	0.00308478	0.00100587
36	-0.00540074	-0.00548074	-0.00386729	-0.00107198	0.000844921	0.00216322	0.00431266	0.00461219	0.00359533	0.00239244
48	-0.00504749	-0.00558366	-0.00402566	-0.00162379	5.76313e-05	0.0013213	0.00374347	0.00441152	0.0038883	0.0029562
60	-0.00463416	-0.0048076	-0.00321901	-0.00121838	0.000206167	0.00096526	0.00282968	0.00320175	0.00292566	0.00257524
72	-0.00433529	-0.00448	-0.00283365	-0.00100619	0.000212615	0.000715216	0.00246384	0.00285479	0.00255118	0.00242648
84	-0.00331665	-0.00335591	-0.0017166	-0.000494071	0.000612652	0.000812065	0.00172819	0.00186651	0.00161394	0.00174898
96	-0.00195327	-0.00175917	-0.000440939	0.000271432	0.000670904	0.000618223	0.000871693	0.000407816	0.000343188	0.00105449
108	-0.000567617	0.000191131	0.0014121	0.00141893	0.00116208	0.00062483	8.50533e-05	-0.000807366	-0.000604436	0.00044643
120	0.00100279	0.002124	0.00329283	0.00288944	0.00197641	0.000797148	-0.0003175	-0.00174468	-0.00165024	-0.000457193
132	0.00168708	0.00330744	0.00460469	0.00424319	0.00306774	0.00160327	-0.000169553	-0.00224858	-0.00245181	-0.00143377
144	0.00264149	0.00493516	0.00637555	0.00622653	0.00456376	0.0023394	-0.00019153	-0.00286451	-0.00336594	-0.00261488
156	0.00286303	0.00627039	0.00803179	0.0079692	0.00606669	0.00364744	0.000354437	-0.00310547	-0.00411103	-0.00335873
168	0.00339621	0.00743827	0.00939119	0.00960875	0.00781003	0.00506615	0.000970364	-0.00308296	-0.0046234	-0.00418648
180	0.00404796	0.00813004	0.0100244	0.0105169	0.00881954	0.00618301	0.00177601	-0.00242095	-0.00414075	-0.00405381
192	0.00405577	0.00818955	0.0102171	0.0108438	0.00923839	0.00685906	0.00277297	-0.00146313	-0.0034169	-0.00381991
204	0.00402838	0.00816691	0.0100019	0.0107139	0.00944717	0.00744847	0.00369359	-0.00035311	-0.00217585	-0.00264531
216	0.003478	0.00747902	0.00909161	0.00961645	0.008602	0.00731305	0.00433683	0.000768054	-0.00064993	-0.000995685
228	0.00272177	0.00637339	0.00803081	0.00874072	0.00823421	0.00740812	0.00510327	0.00234407	0.000978459	0.00025861
240	0.00191631	0.00510046	0.00658863	0.00743828	0.00729754	0.00679047	0.0053731	0.00346008	0.00214211	0.00139218
252	0.00105071	0.0038108	0.00531187	0.00626358	0.00626565	0.00594724	0.00494046	0.00390533	0.00317168	0.00254828
264	0.000706282	0.00297015	0.00424357	0.0049602	0.00497921	0.00468661	0.00431286	0.0038874	0.00398302	0.00349712
276	0.000291635	0.00196343	0.00280393	0.00301062	0.00319196	0.00338594	0.00360498	0.0037795	0.00455224	0.00459535
288	0.000575537	0.00130873	0.00172204	0.0016525	0.00189073	0.00212925	0.00266119	0.00336914	0.00438783	0.00461591
300	0.000527232	0.000623223	0.000579903	3.6949e-05	0.000139572	0.000581627	0.0016717	0.00280882	0.00432641	0.00488988
312	0.000344227	0.000281186	-8.14682e-05	-0.00110012	-0.00112324	-0.00062797	0.000814613	0.00226705	0.00377835	0.00446577
324	0.000685557	0.000281186	-0.000400766	-0.00156336	-0.0016204	-0.0013607	-0.000230635	0.00130628	0.00298298	0.00375334
336	0.000679684	0.000441461	-3.19626e-05	-0.00123176	-0.00156444	-0.00157096	-0.000783702	0.0004258	0.00164256	0.00205455
348	0.000950813	0.000874701	0.000557679	-0.000539337	-0.00104002	-0.00166355	-0.00155746	-0.000786885	0.000265264	0.000575134
360	0.00129191	0.00121203	0.000849748	-0.000334703	-0.00112768	-0.00204287	-0.00224998	-0.0017314	-0.00083316	-0.000540477
372	0.00145067	0.00142653	0.00104403	0.000113875	-0.000567028	-0.00163461	-0.00244132	-0.00255263	-0.00182146	-0.00173767
384	0.00169454	0.00163056	0.00119628	0.000199186	-0.000337835	-0.00130077	-0.00219241	-0.00281424	-0.00257064	-0.00270441
396	0.00192245	0.00200235	0.00160912	0.000756087	0.000159352	-0.000981992	-0.00225121	-0.00329633	-0.00348225	-0.00324472
408	0.00233439	0.00232664	0.00197665	0.00122992	0.000665849	-0.000534028	-0.00231797	-0.00346014	-0.00395315	-0.00399444
420	0.00274552	0.00276852	0.00250582	0.00179037	0.00115254	-0.000194931	-0.00238007	-0.00382504	-0.00413683	-0.00412585
432	0.00304724	0.00316452	0.00292238	0.00223891	0.0015389	-8.04766e-05	-0.00250772	-0.00398578	-0.00425678	-0.00428798
444	0.00344525	0.00352898	0.00320922	0.0024107	0.00139614	-0.000218867	-0.00275734	-0.00424687	-0.00440733	-0.00441716
456	0.00376193	0.00383125	0.0035557	0.00253942	0.00139614	-0.000483152	-0.003036	-0.00455085	-0.00461045	-0.00438854
468	0.00411052	0.00402353	0.00364547	0.00256252	0.00131555	-0.000734778	-0.0035558	-0.00516108	-0.00489679	-0.00420053
480	0.00445665	0.00405132	0.00346785	0.00234447	0.00102562	-0.00118577	-0.00381784	-0.00512512	-0.00467886	-0.00378419
492	0.00456214	0.00408399	0.00348073	0.00227422	0.00102432	-0.00133867	-0.00387208	-0.00517657	-0.0047886	-0.00395112
504	0.00459475	0.00390109	0.00324753	0.00205505	0.000803084	-0.00151074	-0.00387924	-0.00503456	-0.00469839	-0.00375769
516	0.00480489	0.003886	0.0029572	0.0019552	0.000637152	-0.00171835	-0.00400965	-0.00513735	-0.00471443	-0.00367876
528	0.00498446	0.00378884	0.00263784	0.00156167	0.000278234	-0.00181347	-0.00394495	-0.00477218	-0.00445252	-0.00385154
540	0.00510534	0.00368495	0.00245287	0.00129692	4.94223e-05	-0.00200986	-0.00367792	-0.0046044	-0.00449487	-0.00405249
552	0.00514991	0.00338343	0.00168685	0.000611439	-0.000581221	-0.00241477	-0.00353088	-0.00406363	-0.00408729	-0.00391157
564	0.00526132	0.00348577	0.00143835	0.000254906	-0.000906359	-0.00235843	-0.00319743	-0.00356626	-0.00369457	-0.00364533
576	0.00546025	0.0034696	0.00163486	0.000454537	-0.000547581	-0.00227752	-0.00301851	-0.00340689	-0.00345748	-0.00348792
588	0.00557922	0.00343271	0.00131645	0.000320324	-0.000599516	-0.00200501	-0.00266192	-0.0030637	-0.00317101	-0.00314651
600	0.0058419	0.00357399	0.00129958	0.000270248	-0.000701478	-0.00212069	-0.00248252	-0.00264908	-0.00271537	-0.00282352
612	0.00619147	0.0038398	0.00133768	0.000105085	-0.000833556	-0.00194935	-0.00217324	-0.0023394	-0.0025398	-0.00278288
624	0.00607116	0.00385164	0.00137953	0.000345826	-0.000576551	-0.00149286	-0.00180591	-0.0019498	-0.001981	-0.00216763
636	0.00600476	0.00394845	0.00146139	0.000423998	-0.000445516	-0.00122986	-0.00153603	-0.0015916	-0.001586	-0.00171034
648	0.0056973	0.00370228	0.00133785	0.000272324	-0.000371041	-0.00068804	-0.000697757	-0.000725687	-0.000889844	-0.00120602
660	0.00522185	0.0034371	0.00137574	0.000314928	-0.000226778	-0.000464307	-0.000378267	-0.000358658	-0.000450855	-0.000749551
672	0.00469996	0.00329481	0.00114741	0.000191807	-0.000372566	-0.000643295	-0.000459818	-0.00014922	0.00020312	0.000229044
684	0.00419797	0.00309608	0.00126268	-4.78559e-05	-0.000506466	-0.000530581	-9.34852e-05	0.000341514	0.000775319	0.000835964
696	0.00365897	0.00259732	0.00105487	-0.000110018	-0.000474341	-0.000222751	0.000184293	0.000626756	0.0010274	0.00121484
708	0.00265038	0.00184003	0.000253067	-0.000506934	-0.000440401	0.000351879	0.000848306	0.00129611	0.00154844	0.00174103
720	0.00203436	0.00137011	-0.000264633	-0.000993416	-0.000802939	0.000834339	0.00137139	0.00191689	0.00240334	0.00251419
732	0.00117953	0.000584086	-0.000874907	-0.00147557	-0.00112748	0.00101944	0.00166784	0.00238956	0.00295497	0.00313524
744	0.000209901	-0.000310875	-0.00148453	-0.00157186	-0.0010946	0.00120516	0.00227394	0.00312071	0.00373066	0.00393748
756	-8.7912e-05	-0.000707021	-0.00187304	-0.002028	-0.00141459	0.000887984	0.00202703	0.0031385	0.00387508	0.00429392
768	-8.5353e-05	-0.000957429	-0.00226469	-0.00237316	-0.00176033	0.000574071	0.00186946	0.00312275	0.00409712	0.00450351
780	7.35677e-06	-0.000821928	-0.00222365	-0.00261592	-0.00200832	0.000102005	0.00119011	0.00259613	0.00368834	0.00430194
792	0.000588951	-0.000350922	-0.00194018	-0.00276049	-0.00271976	-0.000576137	0.000793184	0.00231886	0.0033164	0.00407065
804	0.00114007	0.000115767	-0.00125421	-0.00236138	-0.00251277	-0.000365317	0.000706631	0.00182528	0.00235466	0.00308565
816	0.00175643	0.000675927	-0.000667546	-0.0015927	-0.00206958	-0.000608414	-0.000125012	0.000802229	0.00144364	0.00261902
828	0.00281729	0.00168445	0.000463615	-0.000801182	-0.00151255	-0.000920761	-0.000679087	-0.000568109	0.000349329	0.00177846
840	0.00382589	0.00274198	0.00155978	-3.06236e-05	-0.00126972	-0.00114749	-0.00137944	-0.00159237	-0.00076273	0.000779377
852	0.00482686	0.00388596	0.00307538	0.00144306	-0.000234473	-0.00149428	-0.0021168	-0.00273769	-0.00251524	-0.000980085
864	0.00631057	0.00537923	0.00451717	0.0026581	0.000676113	-0.00124007	-0.00257993	-0.00411321	-0.00407743	-0.00234592
876	0.00716922	0.006573	0.00576945	0.00351542	0.00141967	-0.00111699	-0.00326498	-0.00517307	-0.00552628	-0.00367284
888	0.0083822	0.00782782	0.00703624	0.00470497	0.0024622	-0.000178481	-0.0028106	-0.00599839	-0.00659577	-0.00491295
900	0.00894093	0.00875102	0.00837754	0.00603231	0.00372712	0.000712043	-0.00233443	-0.00618953	-0.00745288	-0.00603335
912	0.00941381	0.00929575	0.00930886	0.00729785	0.00497219	0.00176733	-0.00146567	-0.0056955	-0.00744747	-0.00659141
924	0.00974591	0.0100228	0.0101458	0.00863842	0.00681619	0.00344959	-0.000125313	-0.00486637	-0.00708702	-0.00781847
936	0.0100733	0.0103996	0.0106752	0.00943152	0.00768364	0.00437691	0.000549769	-0.00460117	-0.00688771	-0.00777458
948	0.00976318	0.0102837	0.0107534	0.00972272	0.00824763	0.00525973	0.00159834	-0.00385563	-0.0064563	-0.00793541
960	0.00912454	0.00985852	0.0103282	0.00974943	0.00839813	0.00575555	0.00207358	-0.00289316	-0.00569415	-0.00750441
972	0.0084323	0.00923697	0.00971278	0.00937527	0.00824463	0.00579303	0.00255863	-0.00207205	-0.00495082	-0.00700938
984	0.00780154	0.00879966	0.00910064	0.00868598	0.00786982	0.00578044	0.00288019	-0.0017303	-0.00407516	-0.0060319
996	0.00693336	0.00808311	0.00839389	0.0081439	0.00760057	0.00585512	0.00333158	-0.00103883	-0.00318257	-0.00525143
1008	0.00665741	0.00773702	0.00827769	0.008206	0.0077026	0.00640125	0.00382422	-0.000988461	-0.00282532	-0.00501263
1020	0.00564841	0.00695706	0.00757391	0.00764897	0.0072611	0.0061373	0.00332796	-0.000582499	-0.00229976	-0.00446156
1032	0.00529625	0.00648766	0.00702133	0.00714035	0.00688852	0.00585514	0.00306859	-0.0008397	-0.00211725	-0.00406427
1044	0.00499063	0.00618203	0.00657627	0.0067247	0.00655706	0.00545571	0.00230958	-0.00168677	-0.00246767	-0.00399298
1056	0.00459957	0.00553434	0.00597061	0.00609119	0.0059685	0.00491154	0.00160836	-0.00301936	-0.00327211	-0.00329924
1068	0.00389055	0.00502972	0.00531676	0.00549413	0.00547934	0.00441	0.0013073	-0.00334593	-0.00343954	-0.00325659
1080	0.00378689	0.00491568	0.00528573	0.00553045	0.00530936	0.00426032	0.00113596	-0.00354988	-0.00423722	-0.00386186
1092	0.00423832	0.00525052	0.00565395	0.005798	0.00568176	0.00472443	0.0016808	-0.00315506	-0.00511969	-0.00458358
1104	0.00444954	0.00546729	0.0060297	0.00614538	0.00600994	0.00502514	0.00176085	-0.00385546	-0.00580549	-0.00513251
1116	0.00442297	0.00531324	0.00606743	0.0063156	0.00601453	0.0050329	0.00157715	-0.00419185	-0.00638075	-0.00576767
1128	0.00450066	0.00529646	0.00598777	0.00611929	0.00581328	0.00441204	0.00120826	-0.00408717	-0.006546	-0.00614223
1140	0.0043711	0.00522978	0.00569522	0.00579331	0.00542125	0.00395866	0.00100382	-0.00399231	-0.00650346	-0.00629541
1152	0.00407813	0.00511074	0.00556438	0.00568708	0.00541893	0.00389895	0.00162054	-0.00370811	-0.0065835	-0.00650013
1164	0.00388945	0.00515153	0.00562123	0.00568221	0.00517726	0.00374021	0.00197725	-0.00344454	-0.00693971	-0.00685507
1176	0.00370181	0.00495975	0.00553468	0.00561308	0.00513146	0.00361109	0.00221334	-0.00227651	-0.00693437	-0.00734104
1188	0.00253941	0.0041457	0.00443642	0.00431786	0.00402491	0.00221739	0.000913009	-0.00380143	-0.00583424	-0.00665755
1200	0.00205918	0.00411582	0.00405885	0.00380159	0.00397491	0.0018533	0.00105718	-0.00227938	-0.00476123	-0.00601408
1212	-0.00147777	0.00295497	0.00349314	0.00407802	0.00532472	0.00469356	0.00414264	-0.00102369	-0.00471146	-0.00518865
